## 38 1 INTRODUCTION

39 Germ cells are unique since only they can undergo meiosis and contribute to the next  
40 generation by producing haploid gametes. Meiosis is a specialized cell division where DNA  
41 replicates once but chromosomes go through two rounds of segregation (Bolcun-Filas and Handel,  
42 2018). The first meiotic division (meiosis-I) segregates homologous chromosome pairs whereas the  
43 second division (meiosis-II) is more similar to mitotic divisions, separating sister chromatids. To  
44 accomplish the unique segregation in meiosis-I, homologous chromosomes (each of which consists  
45 of two sister chromatids) must find each other, pair, and undergo synapsis. In many eukaryotic  
46 organisms, such dynamic chromosome movements that assist in homologue pairing are facilitated  
47 by telomeres (Alleva and Smolikove, 2017). Telomeres attach to the nuclear envelope during the  
48 leptotene stage via a meiotic-specific protein complex. This complex interacts with a protein chain  
49 that spans the nuclear envelope and interacts with the cytoskeleton to drive chromosome  
50 movements (Burke, 2018). The telomeres then cluster at one side of the nucleus, forming the  
51 “bouquet”. This process of chromosome movement and clustering is thought to be essential for  
52 homologous chromosomes to find each other and pair.

53 As homologous chromosomes pair, a proteinaceous structure assembles between them,  
54 called the synaptonemal complex (SC), which holds homologous chromosomes together and  
55 facilitates meiotic recombination (Bolcun-Filas and Handel, 2018). The vertebrate SC consists of 3  
56 synaptonemal complex proteins (SYCP): SYCP2 and SYCP3 form the axial elements, which associates  
57 with the chromosome axes; and SYCP1 forms the transverse elements, which bridges the axial  
58 elements of homologous chromosomes. In addition, multiple SC central element proteins overlap  
59 with the transverse element as chromosomes synapse. The formation of the synaptonemal complex  
60 between homologous chromosomes is critical for segregation of homologous chromosomes to  
61 opposite daughter cells during the first meiotic division. In zebrafish, SC formation is initiated near  
62 the telomeres (Saito et al., 2014; Blokhina et al., 2019). The axial element of the SC assembles along  
63 chromosomes beginning near the chromosome ends, as has been visualized by Sycp2 and Sycp3  
64 localization (Saito et al., 2011; Blokhina et al., 2018; Takemoto et al., 2020). Synapsis ensues, as  
65 seen by visualization of the transverse element protein, Sycp1, which follows Sycp3 localization  
66 (Blokhina et al., 2018; Imai et al., 2021). Thus, homologue pairing and synapsis begins at the  
67 chromosome ends and zippers closed towards the chromosome center. As homologue pairing  
68 commences, meiotic double strand breaks, which are a prerequisite for homologous recombination,  
69 also initiate near the chromosome ends in zebrafish (Saito et al., 2011; Blokhina et al., 2018).

70 Formation of the SC in meiosis is dependent on the cohesion complex. The cohesion  
71 complex has a critical role in the faithful pairing and segregation of chromosomes during both  
72 mitosis and meiosis (Ishiguro, 2019). In both processes the cohesion complex promotes sister  
73 chromatid cohesion and proper chromosome segregation, however in meiosis it has additional roles  
74 in homologue pairing, assembly of the synaptonemal complex, and chromosome architecture. The  
75 meiotic cohesion complex consist of four core subunits: SMC1 $\beta$ , SMC3, RAD21L or REC8, and STAG3  
76 (Fig 1A) (Rankin, 2015). Similarly, mitotic cohesion consists of SMC1 $\alpha$ , SMC3, RAD21, and STAG1/2  
77 (Nasmyth, 2001). The two SMC proteins form a ring surrounding the sister chromatids that is closed  
78 at one end by RAD21L/REC8 and STAG3 (or RAD21 and STAG1/2 in mitosis). This complex holds the  
79 sister chromatids together until anaphase, when separase cleaves RAD21L/REC8/RAD21, allowing  
80 sister chromosomes to move to opposite poles of the cell (Rankin, 2015). In meiosis, the cohesion

81 complex is necessary for assembly of the SC axial element, and therefore promotes synaptonemal  
82 complex formation. The specific components of each cohesion complex contributes to their unique  
83 roles in meiosis and mitosis (Ishiguro, 2019).

84 Vertebrate animals typically have two SMC1 proteins, the mitotic SMC1 $\alpha$  and meiotic  
85 SMC1 $\beta$ , however the distinct roles of these two proteins have not been studied outside of  
86 mammals. Mice lacking SMC1 $\beta$  fail to complete meiosis and present as infertile in both sexes,  
87 indicating that it is specifically necessary for meiosis (Revenkova et al., 2004; Takabayashi et al.,  
88 2009). In *Smc1 $\beta$*  mutant mice, meiosis is blocked in pachytene in males whereas female meiosis  
89 progresses up to metaphase II. The other observed defects in the mutant mice were short  
90 prophase-I axial elements, incomplete synapsis, premature loss of sister chromatid cohesion, and  
91 reduced recombination foci (Revenkova et al., 2004). In addition, mammalian SMC1 $\beta$  has a role in  
92 telomere integrity and attachment of telomeres to the nuclear envelope during meiotic prophase-I.  
93 In mice, SMC1 $\beta$  is required for localization and enrichment of cohesion to telomeres in meiotic  
94 prophase-I and *Smc1 $\beta$*  deficient cells display various types of telomere abnormalities (Adelfalk et al.,  
95 2009). In addition, around 20% of telomeres in the *Smc1 $\beta$*  mutant meiocytes failed to attach to the  
96 nuclear envelope during meiosis. Thus, this protein is necessary for multiple processes required for  
97 proper chromosome segregation during meiosis.

98 Whether or not SMC1 $\beta$  functions in meiosis in non-mammalian vertebrates has not been  
99 investigated, although it was found to be expressed in medaka spermatocytes (Iwai et al., 2004).  
100 Here, we analyzed the function of zebrafish *smc1 $\beta$* , which is named *smc1b* in zebrafish. We found  
101 that all *smc1b* mutant zebrafish develop as males with no other outward visible defects. Histological  
102 examination of the testes revealed that they failed to develop mature sperm and consequently  
103 were sterile. *Smc1b* mutant spermatocytes failed to progress through meiotic prophase-I,  
104 demonstrating that *smc1b* is specifically necessary for meiosis in zebrafish, similar to mice.  
105 Interestingly, zebrafish *smc1b* mutant males exhibited more severe meiotic defects than those  
106 reported in mice, displaying meiotic arrest at the leptotene stage, whereas mouse spermatocytes  
107 reached up to the pachytene stage. Furthermore, the cohesion complex did not appear to be  
108 enriched at telomeres in zebrafish spermatocytes, however meiotic bouquet formation was still  
109 disrupted in mutants. This study broadens our understanding of how the meiotic cohesion complex  
110 functions in vertebrate animals.

## 111 2 MATERIALS AND METHODS

### 112 2.1 Zebrafish strains and husbandry

113 All animal procedures were approved by the UMass Boston Animal Care and Use  
114 Committee. Zebrafish were maintained in a recirculating system on a 14hr light and 10hr dark light  
115 cycle. Strains and lines used in this study were: *smc1b*<sup>sa24632</sup>, *smc1b*<sup>sa24631</sup>, and Tuebingen (Tue).  
116 Embryos of two *smc1b* mutant lines (ID: sa24632 and sa24631) were generated by the Zebrafish  
117 Mutation Project and obtained from the Zebrafish International Resource Center (ZIRC). The  
118 *smc1b*<sup>sa24632</sup> and *smc1b*<sup>sa24631</sup> lines each carry a nonsense mutation which cause premature stop  
119 codons at codon 198 and 261, respectively, whereas the wild-type protein is 1235 amino acids long.  
120 For simplicity, we refer to each mutant line as *smc1b*<sup>Q198X</sup> and *smc1b*<sup>Q261X</sup>.

### 121 2.2 Protein alignment

122 We used the online program MUSCLE [<https://www.ebi.ac.uk/Tools/msa/muscle/>] to  
123 perform protein alignment and phylogenetic tree generation. The NCBI accession number of the  
124 proteins used in this study are as follows: zebrafish Smc1a (NP\_001155103.1), Smc1b  
125 (XP\_009296271.1), Smc2 (NP\_955836.2), Smc3 (NP\_999854.1), Smc4 (NP\_775360.2), Smc5  
126 (NP\_001180470.1), and Smc6 (NP\_001121806.1); mouse Smc1a (NP\_062684.2), Smc1b  
127 (NP\_536718.1), Smc2 (NP\_001288341.1), Smc3 (NP\_999854.1), Smc4 (AAH62939.1), Smc5  
128 (AAH38345.1), and Smc6 (AAH90630.1); human [SMC1A (CAI42646.1), SMC1B (AAI26209.1), SMC2  
129 (AAI44164.1), SMC3 (NP\_005436.1), SMC4 (Q9NTJ3.2), SMC5 (NP\_055925.2), and SMC6  
130 (CAC39248.1).

### 131 **2.3 RT-PCR**

132 Total RNA was isolated from zebrafish organs using TRI-reagent, following the  
133 manufacturer's procedure. Isolated RNA was treated with TURBO DNase to remove genomic DNA  
134 contamination. The first strand cDNA was synthesized using oligo-dT primers and AMV-Reverse  
135 Transcriptase. The *ziwi* transcript, which is expressed in the germ cells of both sexes, was used as a  
136 control for the gonad using previously published primers (Siegfried and Nüsslein-Volhard, 2008).  
137 The ubiquitously expressed gene *ribosomal protein L13 alpha (rpl13a)* was used as control for other  
138 tissues (Tang et al., 2007). The primers used for RT-PCR are listed in table 1.

### 139 **2.4 In situ hybridization (ISH)**

140 Samples for ISH were fixed in 4% paraformaldehyde (PFA) at 4°C overnight. To generate a  
141 probe for detecting *smc1b*, a 390 bp long partial cDNA was made using *smc1b* RT-PCR primers  
142 (Table 1) and sub-cloned into the pGEMT Easy vector [Promega]. Both sense and anti-sense probes  
143 were synthesized using a DIG RNA Labelling kit. The ISH on paraffin-embedded sections were  
144 performed according to the protocol described by Webster *et al* (Webster et al., 2019). Alkaline  
145 phosphatase-conjugated anti-DIG antibody [Roche] and BM Purple substrate were used to visualize  
146 the probe.

### 147 **2.5 Genotyping and PCR**

148 To genotype the *smc1b* mutants, nested PCR reactions were performed, with the second  
149 PCR reaction using dCAPS (Derived Cleaved Amplified Polymorphic Sequences) primers, designed  
150 using the online tool dCAPS Finder 2.0 (<http://biology4.wustl.edu/dcaps/>). In the first PCR, primers  
151 *smc1b* FP and *smc1b* RP1 were used to amplify a 751 bp amplicon, which contained both mutant  
152 alleles. The nested PCR reaction for the *smc1b*<sup>Q198X</sup> line was performed using primers  
153 *smc1b*\_sa24632 FP & RP, followed by Hpy188I digestion. The digested PCR product was run on 7%  
154 acrylamide gel to distinguish mutant (127 bp) and wild-type (152 bp) bands. Primers  
155 *smc1b*\_sa24631 FP & RP2 were used to amplify the *smc1b*<sup>Q261X</sup> mutation region, followed by Ddel  
156 digestion. To distinguish the mutant (182 bp) from wild-type (157 bp) band, the digested PCR  
157 product was run on a 7% acrylamide gel. Sanger sequencing were done on PCR products to confirm  
158 all of the mutations. We also performed sequencing on cDNA from homozygous mutant testes and  
159 detected the predicted mutations. The name and sequence of the genotyping primers are listed in  
160 table 2.

### 161 **2.6 Fertility tests**



162 *Smc1b*<sup>Q198X</sup> mutant males were paired with wild type Tue females. The following morning,  
163 embryos were collected and monitored under a dissecting microscope to see if embryonic cell  
164 cleavages took place. If egg appeared unfertilized, they were kept up to 24 hours to ensure  
165 development did not proceed. Eggs were scored as unfertilized if there was no apparent initiation  
166 of embryonic development. The embryos were raised in 1x E3 buffer in a 28°C incubator.

## 167 **2.7 Histology**

168 Fish were euthanized by tricaine overdose and torsos were isolated and fixed in Bouin's  
169 solution overnight at room temperature. Following dehydration, the fixed tissues were embedding  
170 in paraffin for sectioning. A rotating microtome was used for obtaining 5 µm thick sections. We  
171 used Modified Harris's hematoxylin and eosin for histological staining following standard protocols.  
172 Imaging was performed by a Zeiss Inverted Microscope and acquired using Zen Software.

## 173 **2.8 Immunofluorescence and telomere staining on sections**

174 Testes were isolated and fixed in 4% PFA for overnight at 4°C. The fixed tissues were  
175 embedded in paraffin and cut into 5 µm thick sections. After de-paraffinization and rehydration,  
176 antigen retrieval was done by heating the sections in 10 mM sodium citrate, pH 6.0 solution for 30  
177 minutes using a vegetable steamer. After 3x5 minutes washes in PBST, the sections were circled  
178 with a barrier pen, covered with blocking buffer (1% bovine serum albumin in PBST) and incubated  
179 for 30 minutes in a humidified chamber at room temperature. Primary antibodies were diluted in  
180 the blocking buffer as follows: Sycp3 (NB300-232, Novus Biologicals) at 1:200, γ-H2AX (Neumann et  
181 al., 2011) at 1:200. The sections were incubated overnight with the primary antibodies at 4°C.  
182 Incubation with anti-rabbit Alexa Fluor Plus 488 [Thermo Fisher Scientific] secondary antibody  
183 (1:500) was done for 1 hour at room temperature. Telomeres were stained using a TelC-Cy3 probe  
184 [PNA Bio] following previously described protocol (Saito et al., 2014). To visualize nuclei, sections  
185 were counterstained with DAPI for 10 minutes and cover slipped using Fluoroshield (Sigma-Aldrich)  
186 mounting medium.

## 187 **2.9 Chromosome spread preparation, telomere staining, and immunofluorescence**

188 Meiotic chromosome spreads from zebrafish testes were prepared according to the  
189 previously published protocol (Blokina et al., 2019), except that cell membranes were disrupted by  
190 incubating isolated cells in 0.8% sodium citrate solution for 20 minutes instead of 0.1 M sucrose  
191 solution. Spreads were preserved in -20°C before performing further analysis. Telo-FISH on spreads  
192 was done following the same protocol applied to sections. For antibody labelling, primary antibody  
193 Sycp1 (Blokina et al., 2019), Sycp3 [NB300-232, Novus Biologicals], Smc3 [PA529131, Thermo  
194 Fisher Scientific], and Rad51 [GTX100469, GeneTex] were diluted at 1:200 and incubated overnight  
195 at 4°C. Incubation in appropriate secondary antibody (1:500) was done for 1 hour at room  
196 temperature. Spreads were kept at 4°C before imaging by a confocal microscopy [Zeiss LSM 880].

## 197 **2.10 Image Analysis**

198 Image acquisition was done with ZEN Black software attached to the confocal microscopy. Cell  
199 counting and further analysis was performed using open-sourced software Fiji/Image J. We  
200 performed Student's t-test ( $p < 0.05$ ) to see whether difference between wildtype and mutant  
201 caspase-3 positive cells were significant or not.

## 202 3 RESULTS

### 203 3.1 Zebrafish Smc1b has key domains conserved with mammals

204 To investigate the evolutionary conservation of Smc proteins among the vertebrates, we  
205 generated a phylogenetic tree comparing zebrafish, mouse, and human Smc protein sequences. The  
206 tree has three major branches which consist of: (i) Smc2 and Smc3; (ii) Smc1a, Smc1b, and Smc4;  
207 (iii) Smc5 and Smc6 (all SMC1 $\alpha$ /Smc1a and SMC1 $\beta$ /Smc1b are referred to as Smc1a and Smc1b,  
208 respectively, for simplicity) (Fig 1B). The tree demonstrates that each zebrafish Smc protein clusters  
209 together with the corresponding mammalian protein. We also found that most mouse and human  
210 SMC proteins are evolutionary closer to each other than to those of zebrafish. Surprisingly, mouse  
211 SMC3 grouped with zebrafish Smc3 rather than that of human (Fig 1B). We focused our attention to  
212 the Smc1b protein since previous studies demonstrated a role of this protein in meiosis and  
213 reproduction (Revenkova et al., 2004). To investigate Smc1b conservation among vertebrates, we  
214 performed a protein alignment, which showed that zebrafish Smc1b is 53.04 and 52.11% identical  
215 to human and mouse SMC1 $\beta$ , respectively (Supplemental Fig 1). Higher similarity was observed in  
216 several key domains, such as the N-terminal ATP binding cassette (ABC), the flexible hinge, and the  
217 C-terminal ABC domains, which are 62.75, 66.95, and 75.96 % identical between zebrafish and  
218 human, respectively (Supplemental Fig 1B). However, coil-coiled domains, which are located  
219 between the ABCs and the hinge domain, are less conserved (ranging between 26.53 to 57.14%).  
220 Interestingly, we found four conserved motifs (Walker A & B, ABC transporter signature motif, and  
221 D-Loop) in zebrafish Smc1b, similar to mammals (Supplemental Fig 1) (Revenkova et al., 2001).  
222 Walker A motifs have been shown to bind with azido-ATP, an analogue of ATP (Akhmedov et al.,  
223 1998). The signature motif is essential for head-to-head engagement of SMC dimers and the Walker  
224 B sequence is involved in ATP hydrolysis (Chao et al., 2017). These results suggest that the functions  
225 of zebrafish Smc1b could be similar to the mammalian protein.

### 226 3.2 *Smc1b* is required for spermatogenesis and oogenesis in zebrafish

227 To ask which zebrafish tissues *smc1b* may function in, we assessed *smc1b* expression. We  
228 performed RT-PCR from brains, eyes, gills, hearts, kidneys, livers, ovaries, skin, testes, and viscera of  
229 wild-type adult zebrafish to test which organs of zebrafish express *smc1b*. *Smc1b* was detected in  
230 the testis and ovary but not in other organs tested (Fig 1C), suggesting that *smc1b* has important  
231 functions in zebrafish gonads. Next, we sought to answer which gonadal cells express *smc1b* by  
232 performing *in-situ* hybridization (ISH) on testis and ovary sections. The ISH detected expression in  
233 the spermatogonia and some spermatocytes but not in the mature sperm of the testis (Fig 1D). In  
234 ovaries, *smc1b* was expressed in stage Ib, II, and III oocytes, which are all in meiosis-I (Fig 1E). The  
235 ISH results bolstered the notion that *smc1b* has important roles in zebrafish germ cells.

236 To test whether *smc1b* is required for meiosis in zebrafish, we analyzed two mutant lines.  
237 The *smc1b*<sup>sa24632</sup> and *smc1b*<sup>sa24631</sup> mutations each result in a premature stop codon after amino acid  
238 197 and 260, respectively. Here, we refer to these mutant lines as *smc1b*<sup>Q198X</sup> and *smc1b*<sup>Q261X</sup>,  
239 respectively, reflecting the protein change caused by each mutation (Fig 2A). The homozygous  
240 mutants of both alleles developed normally without showing any outwardly visible defects.  
241 However, all *smc1b* mutant fish (N=54) developed as phenotypic males (based on pigmentation and  
242 body shape). When mutant males were paired with wild-type females, they were able to induce  
243 spawning (N=5), however all eggs were unfertilized (Table 3). To identify the underlying problem,

244 we performed histology on testes from adult mutants and wild-type siblings (Fig 2). The histology  
245 revealed complete lack of spermatozoa in both mutant lines, however spermatogonia and  
246 spermatocytes were present suggesting that mutant germ cells had arrested as spermatocytes (Fig  
247 2C-D). We also established a trans-heterozygous (*smc1b*<sup>Q198X/Q261X</sup>) line, which exhibited phenotypes  
248 indistinguishable to the homozygous mutants, i.e. all male and no sperm (Fig 2E). To test if *smc1b*  
249 mutant testes had abnormal cell death, we performed Immunofluorescence (IF) on mutant and  
250 wild-type testes (N=3) with cleaved caspase-3 antibody. There was no significant difference  
251 between wild-type and mutant testes in terms of apoptosis (Fig 2F-H). Therefore, *smc1b* mutant  
252 cells that arrest in meiosis die by a caspase-3 independent mechanism. These data point to a  
253 potential role of zebrafish *smc1b* in meiosis.

254 Since all *smc1b* mutants were male as adults, we asked if mutants underwent sex reversal  
255 earlier in development. In zebrafish, undifferentiated gonads first pass through a “juvenile ovary”  
256 stage, in which the gonads contain immature oocytes, before undergoing sex-differentiation to  
257 form either an ovary or testis (Takahashi, 1977). Sex-differentiation of the gonads was histologically  
258 apparent at 5 weeks post fertilization (wpf) in our lines (Fig 3). To test if *smc1b* mutants generated  
259 immature oocytes and initiated female differentiation, we performed histology on mutants and  
260 wild-type siblings at 4, 5, and 6 wpf. At 4 wpf, all mutant and wild-type fish had undifferentiated  
261 gonads with no oocytes, indicating that they had not yet reached the juvenile ovary stage (Fig 3A-B).  
262 However, histology at 5 and 6 wpf revealed that 100% of *smc1b* mutant gonads were developing as  
263 testes, whereas the gonads of the wild-type siblings were either testes or ovaries (Fig 3C-H). These  
264 results indicate that *smc1b* mutants did not undergo sex reversal rather directly developed as male.  
265 Since we never detected ovarian follicles in the *smc1b* mutants, we conclude that this gene is also  
266 necessary for oogenesis in zebrafish.

### 267 **3.3 *Smc1b* is necessary for meiotic bouquet formation and pairing and synapsis of** 268 **homologous chromosomes**

269 Since *smc1b* mutant testes had spermatocytes but no mature sperm (Fig 2C-E), we wanted  
270 to know when the spermatocytes arrested in meiosis. We stained mutant and wild-type testis  
271 sections with Sycp3 antibody and telomere fluorescent *in situ* hybridization (Telo-FISH) to  
272 determine the stage of meiosis in spermatocytes. In wild-type zebrafish, the telomeres attach to the  
273 nuclear envelope then cluster at one side of the nucleus to form the bouquet (Saito et al., 2014;  
274 Blokhina et al., 2019). Sycp3 begins to associate with the chromosomes in late leptotene to early  
275 zygotene stages, starting near the telomeres, then extends along the chromosomes as homologous  
276 chromosomes pair (Saito et al., 2014; Blokhina et al., 2018). We found that Sycp3-positive cells were  
277 present in the *smc1b* mutants, indicating that meiosis initiated in mutant testes (Fig 4E,G).  
278 However, in mutant spermatocytes, Sycp3 localization was comparable to wild type leptotene stage  
279 cells and spermatocytes resembling subsequent stages were not present (Fig 4A,C). Telomere  
280 dynamics were also affected in *smc1b* mutants. In wild type, telomeres begin clustering in late  
281 leptotene and form a tight cluster in early zygotene, forming the meiotic bouquet. We found some  
282 mutant spermatocytes with clustered telomeres, however these appeared less tightly clustered  
283 than wild-type bouquet-stage spermatocytes (Fig 4B,F). These data suggest that *smc1b* is necessary  
284 for progression from leptotene to zygonema.

285 To assess the stage at which *smc1b* mutant spermatocytes arrest in more depth, we  
286 performed Telo-FISH combined with IF for Sycp1 and Sycp3 antibodies on chromosome spreads (Fig

287 5). In wild type, Sycp1 protein associated with the synaptonemal complex beginning in early  
288 zygotene stage, as previously reported (Fig 5 A-D) (Saito et al., 2014; Blokhina et al., 2019). Similar  
289 to what we observed on sectioned testes, in *smc1b* mutant spermatocytes, Sycp3 only associated at  
290 the ends of chromosomes, resembling the leptotene stage in wild types (Fig 5E-F). Mutant  
291 spermatocytes had no Sycp1 protein associated with chromosomes, indicating that chromosomes  
292 failed to synapse in *smc1b* mutants (Fig 5E-F). Interestingly, we found about 5% of mutant  
293 spermatocytes exhibited some telomere clustering, which we refer to as “bouquet like” (Fig 5F).  
294 However, no mutant spermatocytes had tightly clustered telomeres characteristic of a fully formed  
295 bouquet, and Sycp1 labeling of the synaptonemal complex was absent. We therefore classified  
296 these “bouquet-like” spermatocytes as leptotene stage cells (Fig 5F-G). Overall, *smc1b* mutant  
297 spermatocytes failed to initiate synapsis between homologous chromosomes and progress to the  
298 zygotene stage, whereas 41% of wild-type primary spermatocytes were in the zygotene stage (Fig  
299 5G). These results indicate that Smc1b is required for bouquet formation as well as pairing and  
300 synapsis of homologous chromosomes in zebrafish spermatocytes.

301 To ask if loss of Smc1b affects association of the cohesion complex with meiotic  
302 chromosomes, we assayed localization of the cohesion complex protein Smc3 (Fig 6). In wild type  
303 spermatocytes, Smc3 localization resembled to that of Sycp3 (Figs 5A-D, 6A-D). Smc3 associated  
304 with the synaptonemal complex in the bouquet stage starting near the chromosome ends (Fig 6B).  
305 By pachytene stage, Smc3 was localized along the entire synaptonemal complex (Fig 6D). Unlike  
306 what has been reported in mouse spermatocytes, Smc3 did not appear to be enriched near the  
307 telomeres in zebrafish, whereas Sycp3 was enriched (Fig 5D', Fig 6D') (Adelfalk et al., 2009). In the  
308 *smc1b* mutant leptotene stage cells, Smc3 protein was detected in nuclei but was not yet associated  
309 with chromosomes, similar to that of wild type (Fig 6A,E). However, while Smc3 associated with  
310 chromosomes at the bouquet stage of wild-type spermatocytes, Smc3 did not associate with  
311 chromosome axes in bouquet-like mutant spermatocytes (Fig 6F). These observations demonstrate  
312 that Smc1b is essential for cohesion complex formation during zebrafish meiosis.

### 313 **3.4 Meiotic double strand breaks form in the absence of Smc1b**

314 Formation of double strand breaks (DSB) is a pre-requisite of DNA recombination during  
315 meiosis. In meiotic cells, several proteins including histone variant  $\gamma$ -H2AX and Rad51 bind to DSBs  
316 and mediate exchange of DNA between homologous chromosomes (Hamer et al., 2003; Howard-Till  
317 et al., 2011). Therefore, expression and localization of these proteins are common markers of DSBs.  
318 To test whether zebrafish *smc1b* is required for meiotic DSB formation, we first performed IF on  
319 *smc1b* mutant testis sections with  $\gamma$ -H2AX antibody. In wild-type spermatocytes,  $\gamma$ -H2AX protein  
320 was initially localized near telomeres, as has been previously reported, which is most apparent in  
321 bouquet-stage cells in sectioned tissue (Fig 7A-D) (Saito et al., 2011; Blokhina et al., 2019). In tissue  
322 sections, early bouquet-stage cells, which are in late leptoneuma, appeared to have  $\gamma$ -H2AX localized  
323 more broadly within nuclei (Fig 7 A,D). In early zygotene stage, the telomeres became more  
324 concentrated on one side of the cell to form the late-bouquet. In these late-bouquet stage  
325 spermatocytes,  $\gamma$ -H2AX localization was also condensed on one side of the nucleus (Fig 7A,D). In  
326 *smc1b* mutant spermatocytes,  $\gamma$ -H2AX was detected but was not visibly concentrated to one side of  
327 the nuclei of spermatocytes (Fig 7E,H). Co-labeling with Telo-FISH, Sycp1, and  $\gamma$ -H2AX on nuclear  
328 spreads clearly demonstrated that  $\gamma$ -H2AX localization initiated near chromosome ends in late-  
329 leptotene and clustered near telomeres in the zygotene bouquet stage in wild-type spermatocytes  
330 (Supplementary Fig 2A-B). Similar to our observations of testes sections, in *smc1b* mutant

331 spermatocytes,  $\gamma$ -H2AX was present but generally not concentrated to one side of the nucleus,  
332 resembling leptotene stage cells (Supplementary Fig 2E-F). These data indicate that DSBs could form  
333 in *smc1b* mutants despite lack of cohesion and synaptonemal complexes.

334 Finally, we stained chromosome spreads with Rad51 antibody to further assay the initiation  
335 of DSB repair of meiotic chromosomes in *smc1b* mutant spermatocytes. Following DSB formation,  
336 5'-3' end resection results in formation of single-stranded DNA that is bound by Dmc1 and Rad51.  
337 These proteins function to initiate DSB repair and strand invasion during meiotic recombination  
338 (Crickard and Greene, 2018). In wild-type spermatocytes, Rad51 protein was first localized near the  
339 chromosome ends in the bouquet-stage and then resolved into one or two spots per chromosome  
340 as early recombination nodules formed, as previously reported (Fig 8A-D) (Blokhina et al., 2019). In  
341 *smc1b* mutant spermatocytes, Rad51 was present in nuclei indicating that early DSB repair  
342 machinery necessary for meiotic recombination was active. Therefore, the meiotic cohesion  
343 complex was not required for initiation of meiotic DSBs in zebrafish spermatocytes.

## 344 4 DISCUSSION

345 Vertebrate animals harbor two *smc1* genes, *Smc1 $\alpha$*  and *Smc1 $\beta$*  (named *smc1a* and *smc1b* in  
346 zebrafish). In mammals, SMC1 $\alpha$  functions primarily in mitotic divisions, whereas SMC1 $\beta$   
347 predominantly functions in meiosis, although SMC1 $\alpha$  has partially overlapping roles with SMC1 $\beta$  in  
348 mammalian meiosis (Biswas et al., 2018). The subfunctionalization of these two proteins as mitotic  
349 versus meiotic regulators has not been investigated outside of mammals. In this study, we  
350 demonstrate that the meiotic cohesion complex protein Smc1b is necessary for meiosis and fertility  
351 in zebrafish. *Smc1b* mutant zebrafish developed as sterile males without any other apparent  
352 defects. Histology showed that *smc1b* mutant spermatocytes entered meiosis but failed to  
353 complete the process as there was no sperm. We found that *smc1b* mutant spermatocytes arrested  
354 at the leptotene stage with a complete failure of homolog pairing and synapsis in the mutant cells.  
355 Nonetheless, meiotic DSBs still happened in *smc1b* mutant spermatocytes. Overall, our results  
356 indicate that Smc1b is essential for meiotic homologous chromosome pairing and synapsis in  
357 zebrafish, demonstrating that Smc1b functions as a meiotic cohesion protein in non-mammalian  
358 vertebrates, as has been found in mammals.

### 359 4.1 Differences in Smc1b requirement among vertebrates

360 We have shown that *smc1b* mutant zebrafish are infertile because of a failure to complete  
361 meiosis and an inability to produce mature sperm. Our finding is in agreement with previous studies  
362 in mammals, which showed that *Smc1 $\beta$*  mutant male mice were sterile due to lack of spermatids  
363 and spermatozoa (Revenkova et al., 2004; Takabayashi et al., 2009). However, zebrafish *smc1b*  
364 mutants displayed more severe phenotypes compared to what has been reported in mouse  
365 mutants. For example, zebrafish *smc1b*<sup>-/-</sup> spermatocytes arrested at leptotene stage whereas mouse  
366 mutant spermatocytes were arrested in pachytene stage and oocytes in metaphase II stage. We  
367 found that zebrafish *smc1b*<sup>-/-</sup> spermatocytes failed to complete meiotic bouquet formation (early  
368 zygonema), even though some cells initiated telomere clustering. Furthermore, pairing and synapsis  
369 of homologous chromosomes did not occur in zebrafish *smc1b*<sup>-/-</sup> spermatocytes. By contrast, mice  
370 lacking SMC1 $\beta$  were able to form a synaptonemal complex (SC) between homologous  
371 chromosomes, although it was shorter than in the wild type and showed defects in late  
372 recombination markers but not early markers (Revenkova et al., 2004). Zebrafish *smc1b*<sup>-/-</sup>



373 spermatocytes arrested in the leptotene stage, which is prior to when recombination takes place.  
374 However, we found that meiotic DSBs, which are a pre-requisite of recombination, formed in  
375 mutant spermatocytes and are therefore independent of *smc1b*.

376 One possible explanation for the discrepancies between the onset of the phenotype in  
377 zebrafish and mouse mutants is potential differences in Smc1a protein expression during meiosis. In  
378 mice, cohesion complex proteins, including SMC1 $\alpha$  and SMC3, are localized to the homologous  
379 chromosome pairs in *Smc1 $\beta$*  mutant spermatocytes, albeit at reduced levels compared to wild type  
380 (Revenkova et al., 2004). Furthermore, expression of SMC1 $\alpha$  in meiosis-I can partly substitute for  
381 SMC1 $\beta$  (Biswas et al., 2018). Zebrafish *smc1b* mutants may have earlier and more severe defects  
382 compared to mouse mutants due to a probable lack of Smc1a expression in spermatocytes. We  
383 attempted to label Smc1a protein in zebrafish to ask if Smc1a expression was absent in zebrafish  
384 spermatocytes, however the commercial antibodies we tested (abcam137707) did not work in  
385 zebrafish. Smc3 labeling demonstrated that zebrafish Smc3 did not localize to chromosomes in  
386 *smc1b*<sup>-/-</sup> spermatocytes, indicating that Smc1b is essential for formation of the meiotic cohesion  
387 complex in zebrafish. Interestingly, mutations that disrupt the mouse meiotic cohesion complex  
388 have similar defects to the zebrafish *smc1b* mutants. For example, mice that were double mutant  
389 for *Rec8* and *Rad21L* or single mutant for *Stag3* failed to form axial elements or SCs and arrested in  
390 leptotene (Llano et al., 2012; Winters et al., 2014). These data suggest that, in contrast to mice,  
391 Smc1b is the only functional Smc1 cohesion subunit in meiotic germ cells in zebrafish.

392 We also found that there are some differences in *smc1b* gene expression between zebrafish  
393 and mice in non-gonadal tissues. Previous studies reported that mouse SMC1 $\beta$  protein was  
394 expressed in the brain, heart, and spleen in addition to gonads (Mannini et al., 2015), but our result  
395 showed it primarily expressed in the gonads (Fig 1). In medaka, Smc1b protein was also detected  
396 specifically in the ovary and testis, however the only non-gonadal tissues assayed were the liver and  
397 OL32 cells (derived from fin tissue) (Iwai et al., 2004). Further exploration of differences in Smc1b  
398 expression across different vertebrate species would be informative in understanding the  
399 subfunctionalization of Smc1a and Smc1b between mitotically and meiotically dividing cell types in  
400 vertebrates.

401 We found that Smc3 colocalized with the synaptonemal complex in zebrafish, showing a  
402 similar localization pattern to that of mouse spermatocytes (Revenkova et al., 2001). However, in  
403 contrast to mice, we did not see Smc3 enrichment near telomeres in wild-type zebrafish  
404 spermatocytes (Fig 6). In mice, SMC1 $\beta$ , SMC3, STAG3, and SYCP2 have all been reported to be  
405 enriched near the telomeres in meiotic prophase-I (Liebe et al., 2004; Adelfalk et al., 2009).  
406 Interestingly, we detected enrichment of Sycp3 near the telomeres, but did not detect enrichment  
407 of Smc3 in zebrafish (Figs 5,6). Cohesion complex enrichment at or near telomeres is thought to  
408 maintain telomere integrity and telomere attachment to the nuclear envelope during meiosis –  
409 *Smc1 $\beta$*  mutant spermatocytes exhibited loss of SMC3 telomere enrichment and had defects in  
410 telomere attachment and integrity in mice (Adelfalk et al., 2009). The presence of enriched Sycp3  
411 instead of Smc3 in zebrafish indicates that there could be different mechanisms of telomere  
412 attachment and maintenance during meiosis in these two species.

#### 413 **4.2 Crosstalk between cohesion, the synaptonemal complex, and DSBs during zebrafish** 414 **meiosis**

415 The reason for failed homolog pairing and synapsis in zebrafish *Smc1b* mutants could be  
416 impaired interactions between cohesion complex proteins and SC proteins. The vertebrate SC  
417 consists of axial element proteins *Sycp2* and *Sycp3*, transverse filament protein *Sycp1*, and multiple  
418 central element proteins (Gao and Colaiácovo, 2018). In mice, cohesion subunits SMC1 and SMC3  
419 physically interact with SC axial element proteins SYCP2 and SYCP3 (Yang and Wang, 2009). In  
420 zebrafish spermatocytes, *Smc1b* is required for *Sycp3* and *Sycp1* to associate along chromosomes  
421 suggesting that interactions between these proteins is necessary for SC formation. This notion is  
422 further supported by recent analysis of zebrafish SC mutants, which also show defects in homolog  
423 pairing and synapsis (Takemoto et al., 2020; Imai et al., 2021). For instance, spermatocytes mutant  
424 for *sycp2*, encoding an SC axial element protein, failed to form an SC, which disrupted homologue  
425 pairing (Takemoto et al., 2020). Interestingly, these mutants did not have the axial element protein  
426 *Sycp3* associated with chromosomes whereas the transverse filament protein *Sycp1* did associate  
427 with chromosomes. In the *sycp2* mutants, the meiotic cohesion complex protein *Rad21l1* co-  
428 localized with *Sycp1* on chromosomes (Takemoto et al., 2020). We found that *Smc1b* was necessary  
429 for the cohesion complex (*Smc3*), *Sycp3*, and *Sycp1* to associate with chromosomes in meiosis.  
430 Together, these data suggest that the cohesion complex may be involved in recruiting *Sycp1* to  
431 chromosomes, even in the absence of axial element proteins. Mutations disrupting the SC  
432 transverse element protein *Sycp1* displayed somewhat less severe defects than those observed for  
433 *sycp2* and *smc1b* mutants. Homologous chromosomes initially paired in *Sycp1* mutant  
434 spermatocytes, however synapsis did not occur which caused loss of pairing and germ cell arrest at  
435 late zygotene/early pachytene stage (Imai et al., 2021). Analysis of these mutants demonstrates  
436 that the zebrafish cohesion complex is intimately associated with SC formation and function during  
437 meiosis, as has been observed in other organisms.

438 *Smc1b* was not required for DSBs suggesting that a functional meiotic cohesion complex is  
439 not a prerequisite for meiotic DSBs in zebrafish spermatocytes. DSB formation during meiosis is  
440 induced by topoisomerase-type enzyme *Spo11* (Keeney et al., 1997). Zebrafish lacking *Spo11*  
441 formed the meiotic bouquet despite failed DSB formation, however homolog pairing and synapsis  
442 were disrupted in the mutant spermatocytes (Blokhina et al., 2019). Formation of meiotic DSBs was  
443 also disrupted in *sycp2* mutants. These mutants also displayed failure of the axial element protein,  
444 *Sycp3*, to associate with chromosomes (Takemoto et al., 2020). By contrast, we found that *smc1b*  
445 mutant spermatocytes lacked formation of the chromosome axes but could still form DSBs. Based  
446 on these observations, we propose that failure to form chromosome axes does not preclude meiotic  
447 DSBs, however axial element proteins may facilitate *Spo11*-mediated DSB formation. Despite DSB  
448 formation, *smc1b* mutants spermatocytes arrested in late-leptotene stage with failed pairing and  
449 synapsis. Therefore, it is unlikely that DSBs that formed in zebrafish *smc1b*<sup>-/-</sup> spermatocytes would  
450 resolve into recombination events. These findings are consistent with mouse mutants lacking a  
451 meiotic cohesion complex (e.g. *Stag3*<sup>-/-</sup> or *Rad21l*<sup>-/-</sup>*Rec8*<sup>-/-</sup>), where DSBs occurred despite a failure to  
452 form chromosome axial elements and a synaptonemal complex (Llano et al., 2012; Winters et al.,  
453 2014).

### 454 4.3 Failure of female development in zebrafish meiotic mutants

455 We found that all *smc1b* mutant zebrafish developed as male, demonstrating that *smc1b* is  
456 required for female development. In zebrafish, formation of ovarian follicles is a prerequisite for  
457 establishment and maintenance of the ovary (Kossack and Draper, 2019). Folliculogenesis involves  
458 the separation of oocytes, which are initially clustered together within nests, into individual oocytes

459 each of which is surrounded by somatic cells. Generally, oocytes initiate meiosis while in the nests  
460 and arrest in meiosis I after follicles form (Elkouby and Mullins, 2017). In zebrafish, folliculogenesis  
461 begins when oocytes are in the pachytene stage and oocytes arrest in the diplotene stage as  
462 oocytes continue to grow and follicles develop (Elkouby et al., 2016). Meiosis-I resumes at the  
463 maturation stage, which occurs just prior to ovulation in zebrafish (stage IV), then arrests again in  
464 meiosis-II until fertilization takes place (Selman et al., 1993). Multiple meiotic mutants have all male  
465 phenotypes in zebrafish, including mutants disrupting *sypc1* and *sypc2* genes (Saito et al., 2011;  
466 Takemoto et al., 2020; Imai et al., 2021). In mutants affecting synaptonemal complex components,  
467 oogenesis was initiated, as juvenile fish had ovarian follicles at 40 dpf (*sypc1*<sup>-/-</sup>) and 28 dpf (*sypc2*<sup>-/-</sup>)  
468 (Takemoto et al., 2020; Imai et al., 2021). Therefore, in the *sypc1* and *sypc2* mutants, oogenesis did  
469 not proceed to stages that could support ovary development into adulthood. However, in both  
470 *spo11* and *mlh1* mutant zebrafish, fish developed into adult males and females (Feitsma et al., 2007;  
471 Blokhina et al., 2018). The *mlh1* mutant zebrafish could complete meiosis but showed  
472 recombination defects and produced aneuploid progeny (Feitsma et al., 2007; Leal et al., 2008).  
473 Thus, sex reversal is not universal in zebrafish meiotic mutants, but it is a common phenotype in  
474 mutants that fail to complete meiosis. Previous studies found that *smc1b* was expressed in  
475 bipotential gonads of juvenile zebrafish, therefore it is likely to play an important role in meiosis in  
476 the juvenile ovary (Tzung et al., 2015). We found that ovarian follicles failed to form in *smc1b*<sup>-/-</sup>  
477 gonads. Because *smc1b* mutants did not form ovarian follicles in juvenile fish, it is likely that oocytes  
478 arrested prior to the pachytene stage.

479

480

## 481 TABLES

482 **Table 1: RT-PCR primers**

| Gene          | Primer name | Location in exon # | Primer sequence (‘5 - 3’) |
|---------------|-------------|--------------------|---------------------------|
| <i>smc1b</i>  | Smc1b RT FP | 21                 | AGAAACGCCAGCGCTCAG        |
| <i>smc1b</i>  | Smc1b RT RP | 25                 | GTCCAGAGTCAGAAGACGGC      |
| <i>rpl13a</i> | FP          | 4+5                | TCTGGAGGACTGTAAGAGGTATGC  |
| <i>rpl13a</i> | RP          | 6                  | AGACGCACAATCTTGAGAGCAG    |
| <i>ziwi</i>   | KS114 (FP)  | 14+15              | CTCAGATGGTGGTGGTGATCT     |
| <i>ziwi</i>   | KS115 (RP)  | 21                 | ACGGTCACACTGTTCCCTTCAG    |

483

484

485 **Table 2: Genotyping primers**  
 486 Mismatch bases are underlined

| Primer name             | Primer sequence ('5 - 3')         |
|-------------------------|-----------------------------------|
| smc1b FP                | GGCGAAGTACTACTGGAGAGC             |
| smc1b RP1               | CGTTTTGTAATTTGTGTGATTCACC         |
| smc1b_sa24631 FP        | TATCAGTCGCTGGTGGATGA              |
| smc1b_sa24631 dCAPS RP2 | TCTTTCTTCTGGGTCTTAC <u>CTTA</u>   |
| smc1b_sa24632 FP        | GAACGAATCAGTGGCTCTGG              |
| smc1b_sa24632 dCAPS RP  | ACCTCTGTCTTATCTTTAAAG <u>TCTG</u> |

487

488 **Table 3: *Smc1b* mutant males are infertile**

489 SD: standard deviation

| Genotype                      | Number of crosses | Numbers of eggs per cross<br>(Mean ± SD) | Percentage of fertilized eggs<br>(Mean ± SD) |
|-------------------------------|-------------------|------------------------------------------|----------------------------------------------|
| <i>smc1b</i> <sup>+/+</sup>   | 5                 | 65.00 ± 13.21                            | 97.11 ± 3.40                                 |
| <i>smc1b</i> <sup>Q198X</sup> | 5                 | 92.6 ± 19.11                             | 0.0 ± 0.0                                    |

490

491 **FIGURE LEGENDS**

492 **Figure 1:** Zebrafish *smc1b* is conserved and expressed in germ cells. (A) Cartoon representing the  
 493 meiotic cohesion complex. (B) Phylogenetic tree of zebrafish (z), mouse (m), and human (h) Smc  
 494 protein family. Numbers to the right of protein names represent bootstrap confidence values. (C) RT-  
 495 PCR of *smc1b* and control gene *rpl13a* using cDNA generated from brains, eyes, gills, hearts,  
 496 kidneys, livers, ovaries, skin, testes, and viscera of wild-type adult zebrafish. (D-E) *In-situ*  
 497 hybridization (ISH) on testis (D) and ovary (E) sections of wild-type zebrafish. ISH using sense  
 498 probes were run as negative controls. Scale bars are 20 μm for testes and 100 μm for ovaries.

499 **Figure 2:** *Smc1b* mutant zebrafish display defects in spermatogenesis. (A) *Smc1b* mutations used in  
 500 this study: *smc1b*<sup>Q198X</sup> located in exon 4 and *smc1b*<sup>Q261X</sup> in exon 5. Both mutations cause premature

501 termination codons. (B-G) Hematoxylin-eosin (H&E) staining on adult testes of wild type (B),  
502 *smc1b*<sup>Q261X(-/-)</sup> (C), *smc1b*<sup>Q198X(-/-)</sup> (D), and *smc1b*<sup>Q198X/Q261X</sup> (E). Dashed lines denote examples of:  
503 spermatogonia (yellow), spermatocytes (red), and spermatozoa (orange). (F-G) Caspase-3 (green) and  
504 DAPI (blue) staining on adult testes from wild type (F) and *smc1b* mutant (G). Caspase-3 positive cells  
505 are indicated by arrows. (H) Quantification of caspase-3 positive cells per testis area in the mutant  
506 (N=3 testes) and wild type (N=3 testes). Student's t-test shows no significant (p = 0.3524) difference  
507 between wild-type and mutant caspase-3 positive cells numbers. Scale bars are 50  $\mu$ m.

508 **Figure 3:** Absence of oogenesis in *smc1b*<sup>Q198X</sup> mutants. Hematoxylin-eosin stain of wild-type and  
509 *smc1b* mutant gonads during sex-differentiation. (A-B) Undifferentiated gonads in wild-type (A) and  
510 mutant (B) fish at 4 weeks old. (C-H) Although oogenesis (C, F) and spermatogenesis (D, G) took  
511 place in wild-type gonads at 5- and 6-weeks old, only spermatogenesis progressed in the mutants (E,  
512 H). Gonads are outlined by red dashed line, scale is 50  $\mu$ m. N = total number of individuals with the  
513 gonad histology pictured per total number of fish analyzed for each age group.

514 **Figure 4:** Spermatocytes in *smc1b*<sup>Q198X</sup> mutants failed to progress beyond leptotene stage. Labelling  
515 of Sycp3 and telomeres in adult wild-type and mutant testes sections: Sycp3 (green), telomere *in situ*  
516 hybridization (orange), DAPI nuclear stain (blue). (A-H) Leptotene stage spermatocytes are present in  
517 both wild-type and mutant spermatocytes, examples circled in white. Bouquet stage cells (circled red)  
518 are present in wild-type but not in the mutant. Insets are zoomed images of the areas boxed in purple.  
519 Scale bar is 20  $\mu$ m.

520 **Figure 5:** Failed pairing and synapsis in *smc1b*<sup>Q198X</sup> mutant spermatocytes. (A-F) Labelling of Sycp3  
521 and Sycp1 proteins and telomeres (telo) on meiotic chromosome spreads from adult testes. (A-D) In  
522 wild-type spermatocytes, leptotene stage cells began expressing Sycp1 and Sycp3 protein. The  
523 synaptonemal complex proteins associated with chromosomes and assembled between homologous  
524 pairs in zygotene through pachytene stages as homologue pairing and synapsis occurred. (D') Sycp3  
525 exhibited enrichment at or near telomeres. Images show enlarged views of the red boxed areas in D.  
526 (E-F) *Smc1b* mutant spermatocytes expressed Sycp1 and Sycp3 in leptotene stage, similar to wild type.  
527 However, Sycp3 only labeled chromosomes near the ends and Sycp1 did not associate with  
528 chromosomes. A small percentage of mutant cells exhibited some telomere clustering one side of the  
529 nucleus (F), which we called bouquet-like and classified as leptotene stage. (G) Quantification of  
530 spermatocytes showed that all mutant cells are in leptotene stage compared to about 40% in wild type.  
531 Later stages were not observed in the mutants (N = 52 wild-type and 130 mutant cells). Scale bar is 10  
532  $\mu$ m.

533 **Figure 6:** The cohesion complex does not associate with meiotic chromosomes in zebrafish  
534 spermatocytes. (A-E) Immunolabelling of Smc3, and Sycp1 in wild-type (A-D) and *smc1b* mutant (E-  
535 F) chromosome spreads. (A-D) In wild-type cells, Smc3 showed a localization pattern similar to Sycp1.  
536 (D') Smc3 was not enriched at telomeres. Images show enlarged views of the red-boxed areas in D.  
537 (E-F) In mutant cells, Smc3 was expressed in leptotene stage but failed to load onto chromosomes.  
538 Scale is 10  $\mu$ m.

539 **Figure 7:** DNA double strand break marker  $\gamma$ -H2Ax was expressed in *smc1b*<sup>Q198X</sup> mutant testes.  
540 Immunolabeling of  $\gamma$ -H2Ax (green) and Telo-FISH (orange) on wild-type and mutant testis sections.  
541 (A-D) In wild-type early bouquet stage spermatocytes,  $\gamma$ -H2Ax appeared to localize more broadly in  
542 nuclei on testis sections (red dashed lines). Bouquet stage spermatocytes with tightly clustered  
543 telomeres (white dashed lines) exhibited  $\gamma$ -H2Ax localization near telomeres. (E-H) Early bouquet-  
544 stage spermatocytes in *smc1b* mutants display broad  $\gamma$ -H2Ax expression similar to wild type, however



545 tight clustering of telomeres and  $\gamma$ -H2Ax to one side of the nucleus was not observed. Scale bar is 20  
546  $\mu$ m.

547 **Figure 8:** DNA double strand break and recombination marker Rad51 was expressed in *smc1b*<sup>Q198X</sup>  
548 mutant spermatocytes. Immunolabelling of Rad51 (green) and Sycp1 (magenta) in wild-type and  
549 mutant spreads, combined with telomere (telo) *in situ* hybridization (orange). (A-B) Rad51 protein was  
550 detected in wild-type beginning in leptotene stage and was initially located near the chromosome ends  
551 in leptotene and bouquet stages. (C,D) In more advanced wild-type spermatocytes, Rad51 localization  
552 become more distinct and resolved to one or two spots per chromosome. (E-F) Mutant spermatocytes  
553 had detectable levels of Rad51. Scale bar is 10  $\mu$ m.

554 **Supplementary Figure 1:** Conservation of key motifs in vertebrate Smc1b proteins. (A) Graphical  
555 representation of zebrafish Smc1b protein. Numbers inside boxes represent amino acid position in the  
556 corresponding domain. (B) Percentage of identical amino acid residues between human (h) and  
557 zebrafish (z), and mouse (m) and zebrafish Smc1b proteins. (C-E) Protein sequence alignments of the  
558 N-terminal ATP binding domain (C), flexible hinge domain (D), and C-terminal ATP binding domain  
559 (E). The conserved motifs are highlighted in green. The consensus motif sequences are Walker A:  
560 GxxGxGK(S/T), ABC transporter signature motif: LSGG(E/Q) (K/R), Walker B: hhhhDE, where x is  
561 any of 20 amino acid and h is any hydrophobic residue.

562 **Supplementary Figure 2:** DNA double strand break marker  $\gamma$ -H2Ax was expressed in *smc1b*<sup>Q198X</sup>  
563 mutant testes. (A-F) Labeling of  $\gamma$ -H2Ax (green), Sycp1 (magenta), and Telo-FISH (orange) on wild-  
564 type (A-D) and mutant (E-F) chromosome spreads from testes.  $\gamma$ -H2Ax protein is expressed in both  
565 wild-type and mutant nuclei. Scale bar is 10  $\mu$ m.

## 566 CONFLICT OF INTEREST STATEMENT

567 *The authors declare that the research was conducted in the absence of any commercial or financial*  
568 *relationships that could be construed as a potential conflict of interest.*

## 569 AUTHOR CONTRIBUTIONS

570 KNI contributed to data shown in all figures. MMM contributed to data shown in Figures 2 and 3.  
571 KNI and KRS designed the experiments, analysed data, and wrote the manuscript.

## 572 FUNDING

573 This work was supported by The National Institute of Health – NICHD award 1R15HD095735-01.  
574 KNI was also supported by a CSM Dean’s Doctoral Research Fellowship. MMM was supported by a  
575 McCone and Alumni Research Fellowship from the Department of Biology and a CSM Research  
576 Fellowship from the College of Science and Mathematics at UMass Boston.

## 577 ACKNOWLEDGMENTS

578 We are grateful to Sean Burgess and James Amatruda for providing Sycp1 and  $\gamma$ -H2AX antibodies,  
579 respectively. We are also thankful to The Zebrafish Mutation Project for generating the *smc1b*  
580 mutants and to the Zebrafish International Resource Center (ZIRC) for supplying *smc1b* mutant  
581 zebrafish. Special thanks to Jessica MacNeil and Kavita Venkataramani for helpful discussions about  
582 the manuscript.

583 **REFERENCES**

- 584 Adelfalk, C., Janschek, J., Revenkova, E., Blei, C., Liebe, B., Göb, E., et al. (2009). Cohesin SMC1 $\beta$   
585 protects telomeres in meiocytes. *J. Cell Biol.* 187, 185–199. doi:10.1083/jcb.200808016.
- 586 Akhmedov, A. T., Frei, C., Tsai-Pflugfelder, M., Kemper, B., Gasser, S. M., and Jessberger, R.  
587 (1998). Structural maintenance of chromosomes protein C-terminal domains bind preferentially  
588 to DNA with secondary structure. *J. Biol. Chem.* 273, 24088–24094.  
589 doi:10.1074/jbc.273.37.24088.
- 590 Alleva, B., and Smolikove, S. (2017). Moving and stopping: Regulation of chromosome movement  
591 to promote meiotic chromosome pairing and synapsis. *Nucleus* 8, 613–624.  
592 doi:10.1080/19491034.2017.1358329.
- 593 Biswas, U., Stevense, M., and Jessberger, R. (2018). SMC1 $\alpha$  Substitutes for Many Meiotic Functions  
594 of SMC1 $\beta$  but Cannot Protect Telomeres from Damage. *Curr. Biol.* 28, 249-261.e4.  
595 doi:10.1016/j.cub.2017.12.020.
- 596 Blokhina, Y. P., Nguyen, A. D., Draper, B. W., and Burgess, S. M. (2018). The telomere bouquet is a  
597 hub where meiotic double-strand breaks, synapsis, and stable homolog juxtaposition are  
598 coordinated in the zebrafish, *Danio rerio*. *PLoS Genet.*
- 599 Bolcun-Filas, E., and Handel, M. A. (2018). Meiosis: the chromosomal foundation of reproduction.  
600 *Biol. Reprod.* 99, 112–126. doi:10.1093/biolre/iocy021.
- 601 Burke, B. (2018). LINC complexes as regulators of meiosis. *Curr. Opin. Cell Biol.* 52, 22–29.  
602 doi:10.1016/j.ceb.2018.01.005.
- 603 Chao, L. F. I., Singh, M., Thompson, J., Yates, J. R., and Hagstrom, K. A. (2017). An SMC-like  
604 protein binds and regulates *Caenorhabditis elegans* condensins. *PLoS Genet.* 13, 1–29.  
605 doi:10.1371/journal.pgen.1006614.
- 606 Crickard, J. B., and Greene, E. C. (2018). Biochemical attributes of mitotic and meiotic presynaptic  
607 complexes. *DNA Repair (Amst)*. 71, 148–157. doi:10.1016/j.dnarep.2018.08.018.
- 608 Elkouby, Y. M., Jamieson-Lucy, A., and Mullins, M. C. (2016). Oocyte Polarization Is Coupled to  
609 the Chromosomal Bouquet, a Conserved Polarized Nuclear Configuration in Meiosis. *PLoS*  
610 *Biol.* 14. doi:10.1371/journal.pbio.1002335.
- 611 Elkouby, Y. M., and Mullins, M. C. (2017). Coordination of cellular differentiation, polarity, mitosis  
612 and meiosis – New findings from early vertebrate oogenesis. *Dev. Biol.*  
613 doi:10.1016/j.ydbio.2017.06.029.
- 614 Feitsma, H., Leal, M. C., Moens, P. B., Cuppen, E., and Schulz, R. W. (2007). Mlh1 Deficiency in  
615 Zebrafish Results in Male Sterility and Aneuploid as Well as Triploid Progeny in Females.  
616 *Genetics* 175, 1561–1569. doi:10.1534/genetics.106.068171.
- 617 Gao, J., and Colaiácovo, M. P. (2018). Zipping and Unzipping: Protein Modifications Regulating  
618 Synaptonemal Complex Dynamics. *Trends Genet.* 34, 232–245. doi:10.1016/j.tig.2017.12.001.

- 619 Hamer, G., Roepers-Gajadien, H. L., Van Duyn-Goedhart, A., Gademan, I. S., Kal, H. B., Van Buul,  
620 P. P. W., et al. (2003). DNA double-strand breaks and  $\gamma$ -H2AX signaling in the testis. *Biol.*  
621 *Reprod.* 68, 628–634. doi:10.1095/biolreprod.102.008672.
- 622 Howard-Till, R. A., Lukaszewicz, A., and Loidl, J. (2011). The recombinases Rad51 and Dmc1 play  
623 distinct roles in DNA break repair and recombination partner choice in the meiosis of  
624 *Tetrahymena*. *PLoS Genet.* 7. doi:10.1371/journal.pgen.1001359.
- 625 Imai, Y., Saito, K., Takemoto, K., Velilla, F., Kawasaki, T., Ishiguro, K. I., et al. (2021). Sycp1 Is  
626 Not Required for Subtelomeric DNA Double-Strand Breaks but Is Required for Homologous  
627 Alignment in Zebrafish Spermatocytes. *Front. Cell Dev. Biol.* 9, 1–19.  
628 doi:10.3389/fcell.2021.664377.
- 629 Ishiguro, K. ichiro (2019). The cohesin complex in mammalian meiosis. *Genes to Cells* 24, 6–30.  
630 doi:10.1111/gtc.12652.
- 631 Iwai, T., Lee, J., Yoshii, A., Yokota, T., Mita, K., and Yamashita, M. (2004). Changes in the  
632 expression and localization of cohesin subunits during meiosis in a non-mammalian vertebrate,  
633 the medaka fish. *Gene Expr. Patterns* 4, 495–504. doi:10.1016/j.modgep.2004.03.004.
- 634 Keeney, S., Giroux, C. N., and Kleckner, N. (1997). Meiosis-specific DNA double-strand breaks are  
635 catalyzed by Spo11, a member of a widely conserved protein family. *Cell* 88, 375–384.  
636 doi:10.1016/S0092-8674(00)81876-0.
- 637 Kossack, M. E., and Draper, B. W. (2019). Genetic regulation of sex determination and maintenance  
638 in zebrafish (*Danio rerio*). *Curr. Top. Dev. Biol.* 134, 119–149.  
639 doi:10.1016/bs.ctdb.2019.02.004.
- 640 Leal, M. C., Feitsma, H., Cuppen, E., França, L. R., and Schulz, R. W. (2008). Completion of  
641 meiosis in male zebrafish (*Danio rerio*) despite lack of DNA mismatch repair gene *mlh1*. *Cell*  
642 *Tissue Res.* 332, 133–139. doi:10.1007/s00441-007-0550-z.
- 643 Liebe, B., Alsheimer, M., Höög, C., Benavente, R., and Scherthan, H. (2004). Telomere Attachment,  
644 Meiotic Chromosome Condensation, Pairing, and Bouquet Stage Duration Are Modified in  
645 Spermatocytes Lacking Axial Elements. *Mol. Biol. Cell* 15, 827–837. doi:10.1091/mbc.E03-07-  
646 0524.
- 647 Llano, E., Herrán, Y., García-Tuñón, I., Gutiérrez-Caballero, C., de Álava, E., Barbero, J. L., et al.  
648 (2012). Meiotic cohesin complexes are essential for the formation of the axial element in mice.  
649 *J. Cell Biol.* 197, 877–885. doi:10.1083/jcb.201201100.
- 650 Mannini, L., Cucco, F., Quarantotti, V., Amato, C., Tinti, M., Tana, L., et al. (2015). SMC1B is  
651 present in mammalian somatic cells and interacts with mitotic cohesin proteins. *Sci. Rep.* 5, 1–  
652 11. doi:10.1038/srep18472.
- 653 Nasmyth, K. (2001). Disseminating the genome: Joining, resolving, and separating sister chromatids  
654 during mitosis and meiosis. *Annu. Rev. Genet.* 35, 673–745.  
655 doi:10.1146/annurev.genet.35.102401.091334.
- 656 Neumann, J. C., Chandler, G. L., Damoulis, V. A., Fustinoa, N. J., Lillard, K., Looijenga, L., et al.

- 657 (2011). Mutation in the type IB bone morphogenetic protein receptor *alk6b* impairs germ-cell  
658 differentiation and causes germ-cell tumors in zebrafish. *Proc. Natl. Acad. Sci. U. S. A.* 108,  
659 13153–13158. doi:10.1073/pnas.1102311108.
- 660 Rankin, S. (2015). Complex elaboration: Making sense of meiotic cohesin dynamics. *FEBS J.* 282,  
661 2413–2430. doi:10.1111/febs.13301.
- 662 Revenkova, E., Eijpe, M., Heyting, C., Gross, B., and Jessberger, R. (2001). Novel Meiosis-Specific  
663 Isoform of Mammalian SMC1. *Mol. Cell. Biol.* 21, 6984–6998. doi:10.1128/mcb.21.20.6984-  
664 6998.2001.
- 665 Revenkova, E., Eijpe, M., Heyting, C., Hodges, C. A., Hunt, P. A., Liebe, B., et al. (2004). Cohesin  
666 SMC1 $\beta$  is required for meiotic chromosome dynamics, sister chromatid cohesion and DNA  
667 recombination. *Nat. Cell Biol.* 6, 555–562. doi:10.1038/ncb1135.
- 668 Saito, K., Sakai, C., Kawasaki, T., and Sakai, N. (2014). Telomere distribution pattern and synapsis  
669 initiation during spermatogenesis in zebrafish. *Dev. Dyn.* 243, 1448–1456.  
670 doi:10.1002/dvdy.24166.
- 671 Saito, K., Siegfried, K. R., Nüsslein-Volhard, C., and Sakai, N. (2011). Isolation and cytogenetic  
672 characterization of zebrafish meiotic prophase I mutants. *Dev. Dyn.* 240, 1779–1792.  
673 doi:10.1002/dvdy.22661.
- 674 Selman, K., Wallace, R. A., Sarka, A., and Qi, X. (1993). Stages of oocyte development in the  
675 zebrafish, *Brachydanio rerio*. *J. Morphol.* 218, 203–224. doi:10.1002/jmor.1052180209.
- 676 Siegfried, K. R., and Nüsslein-Volhard, C. (2008). Germ line control of female sex determination in  
677 zebrafish. *Dev. Biol.* 324, 277–287. doi:10.1016/j.ydbio.2008.09.025.
- 678 Takabayashi, S., Yamauchi, Y., Tsume, M., Noguchi, M., and Katoh, H. (2009). A spontaneous  
679 *Smc1b* mutation causes cohesin protein dysfunction and sterility in mice. *Exp. Biol. Med.* 234,  
680 994–1001. doi:10.3181/0808-RM-244.
- 681 Takahashi, H. (1977). Juvenile Hermaphroditism in the Zebrafish, *Brachydanio rerio*. *Bull. Fac. Fish.*  
682 *Hokkaido Univ.* 28, 57–65. Available at: <http://www.mendeley.com/catalog/juvenile-hermaphroditism-zebrafish-brachydanio-rerio/> [Accessed July 17, 2015].
- 684 Takemoto, K., Imai, Y., Saito, K., Kawasaki, T., Carlton, P. M., Ishiguro, K. I., et al. (2020). *Sycp2*  
685 is essential for synaptonemal complex assembly, early meiotic recombination and homologous  
686 pairing in zebrafish spermatocytes. *PLoS Genet.* 16, 1–29. doi:10.1371/journal.pgen.1008640.
- 687 Tang, R., Dodd, A., Lai, D., McNabb, W. C., and Love, D. R. (2007). Validation of zebrafish (*Danio*  
688 *rerio*) reference genes for quantitative real-time RT-PCR normalization. *Acta Biochim. Biophys.*  
689 *Sin. (Shanghai).* 39, 384–90. Available at: <http://www.ncbi.nlm.nih.gov/pubmed/17492136>  
690 [Accessed January 1, 2016].
- 691 Tzung, K.-W., Goto, R., Saju, J. M., Sreenivasan, R., Saito, T., Arai, K., et al. (2015). Early  
692 Depletion of Primordial Germ Cells in Zebrafish Promotes Testis Formation. *Stem Cell Reports*  
693 4, 61–73. doi:10.1016/j.stemcr.2014.10.011.

- 694 Webster, K. A., Henke, K., Ingalls, D. M., Nahrin, A., Harris, M. P., and Siegfried, K. R. (2019).  
695 Cyclin-dependent kinase 21 is a novel regulator of proliferation and meiosis in the male  
696 germline of zebrafish. *Reproduction* 157, 383–398. doi:10.1530/REP-18-0386.
- 697 Winters, T., McNicoll, F., and Jessberger, R. (2014). Meiotic cohesin STAG3 is required for  
698 chromosome axis formation and sister chromatid cohesion. *EMBO J.* 33, 1256–1270.  
699 doi:10.1002/emj.201387330.
- 700 Yang, F., and Wang, P. J. (2009). The mammalian synaptonemal complex: A scaffold and beyond.  
701 *Genome Dyn.* 5. doi:10.1159/000166620.
- 702



Figure 1

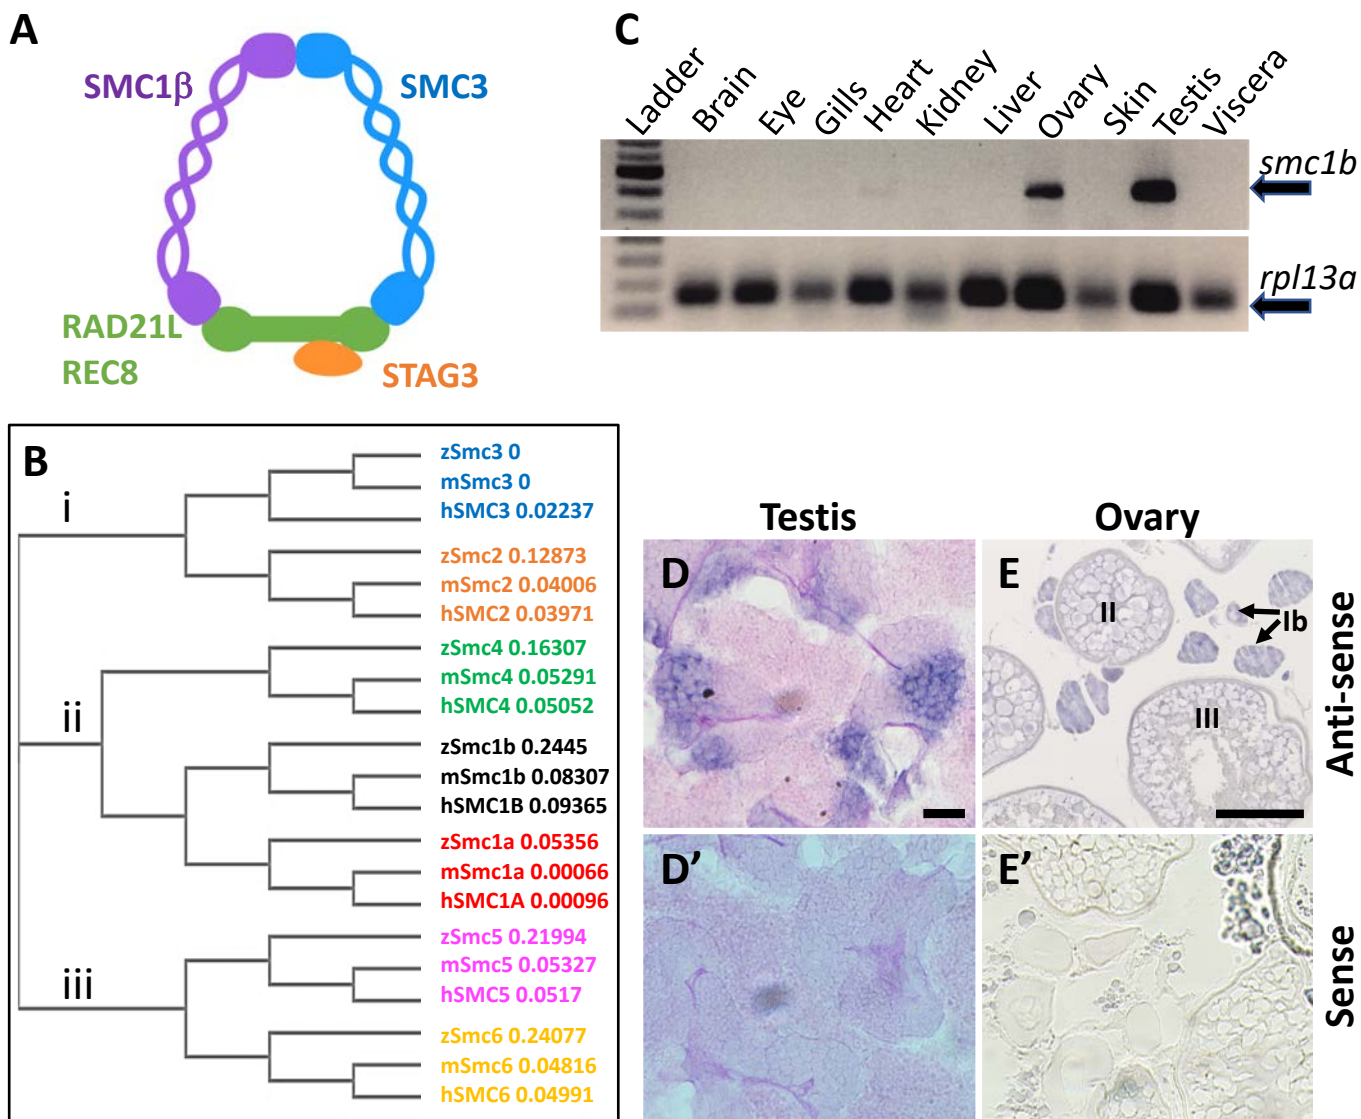

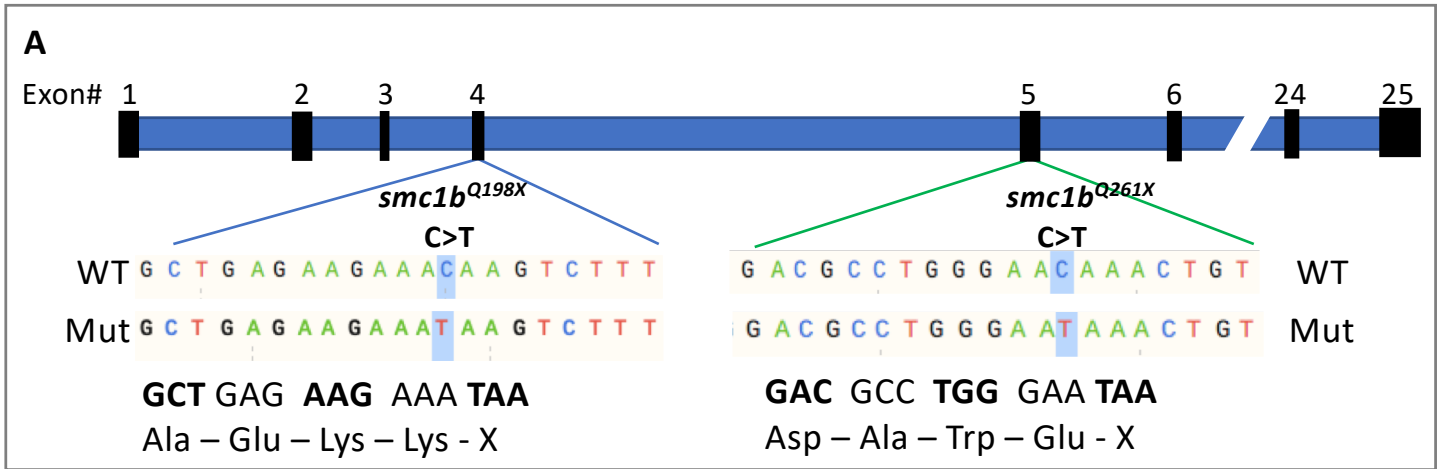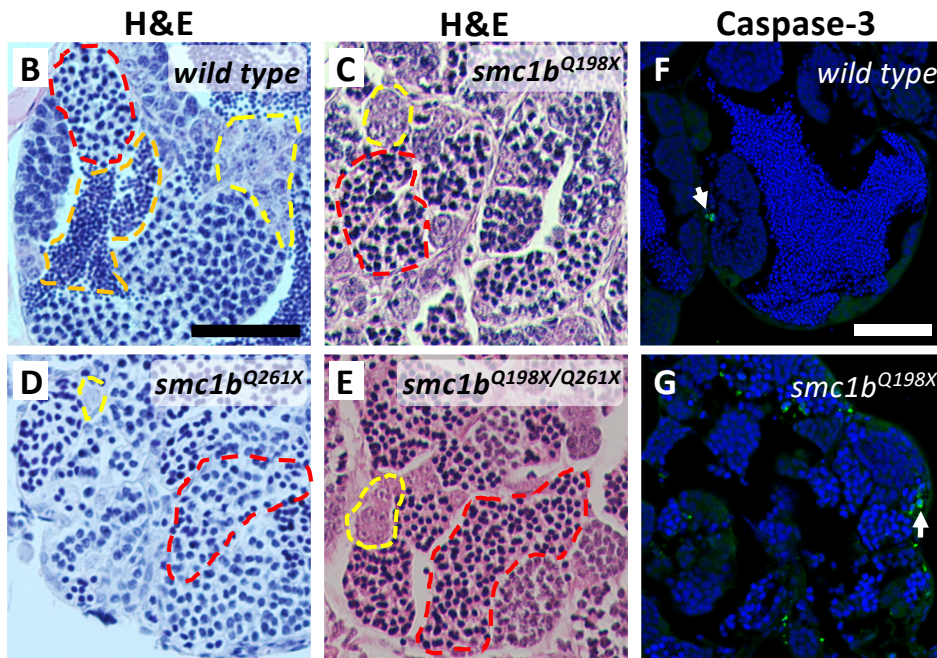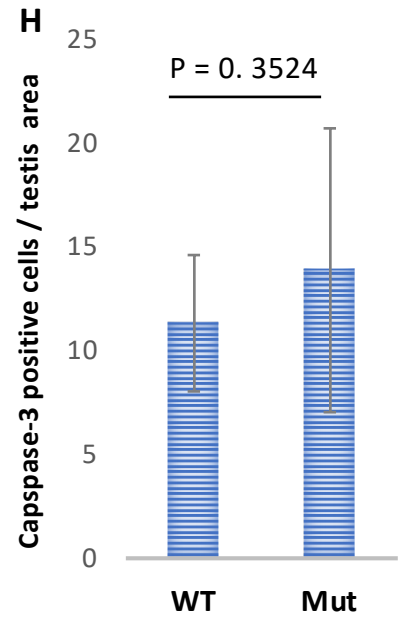

*smc1b*<sup>+/+</sup>

*smc1b*<sup>-/-</sup>

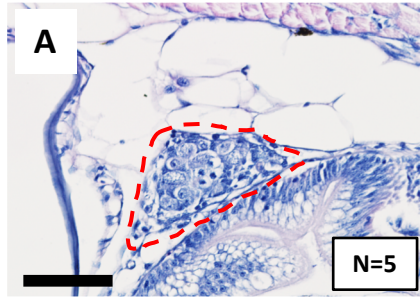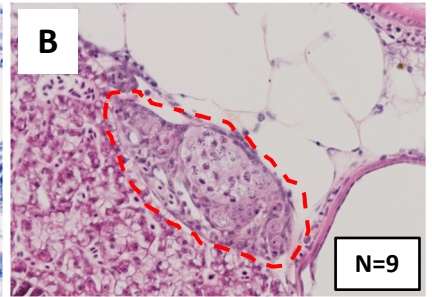

4 weeks

*smc1b*<sup>+/+</sup>

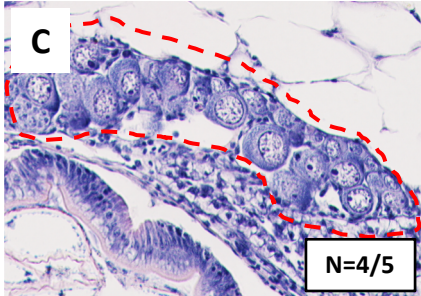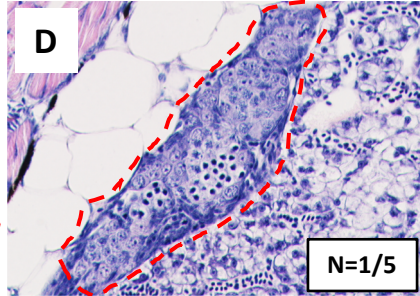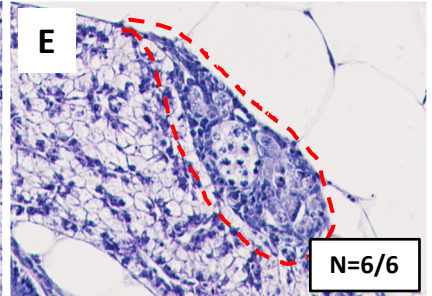

5 weeks

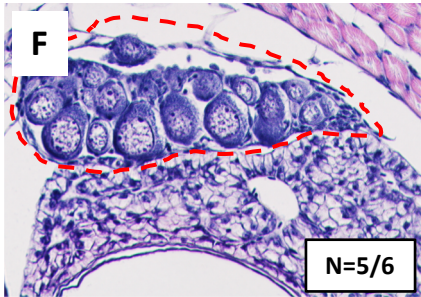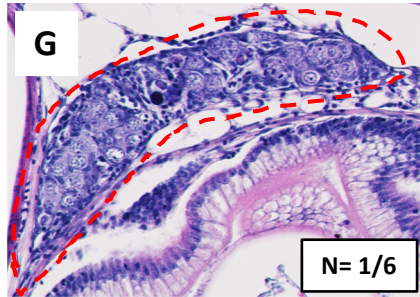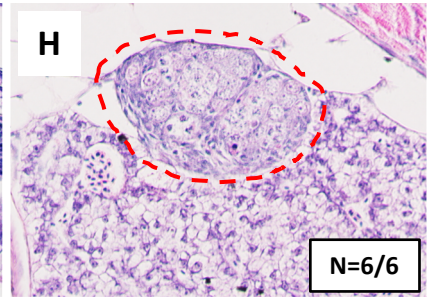

6 weeks



Sycp3

Telomere

Sycp3+Telo

DAPI

*smc1b*<sup>+/+</sup>

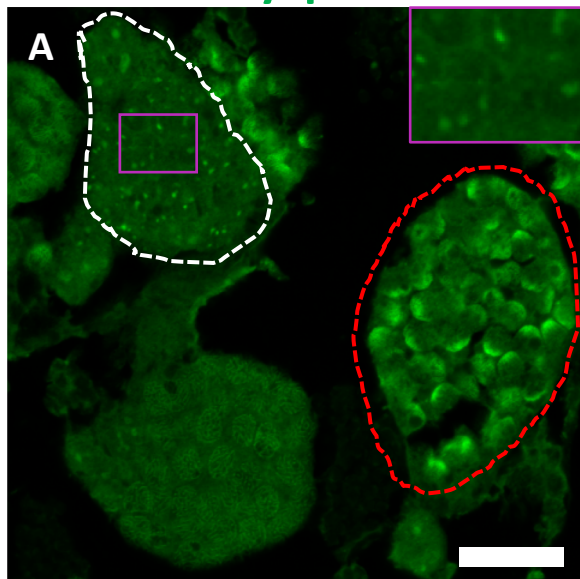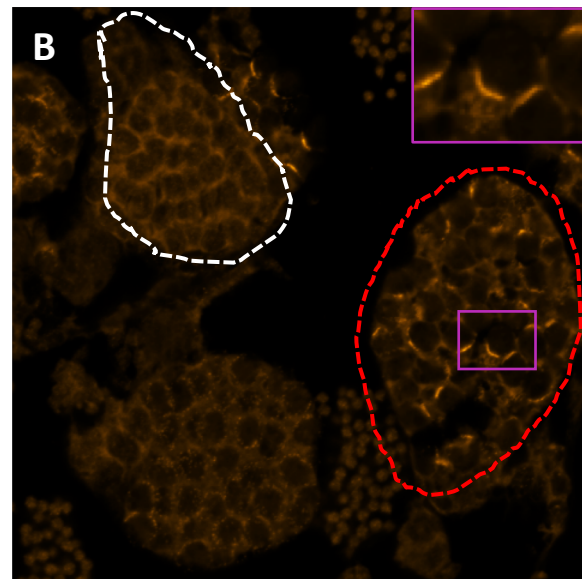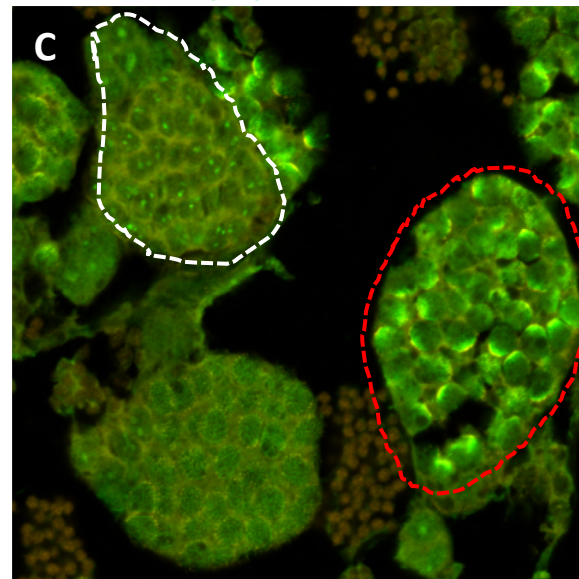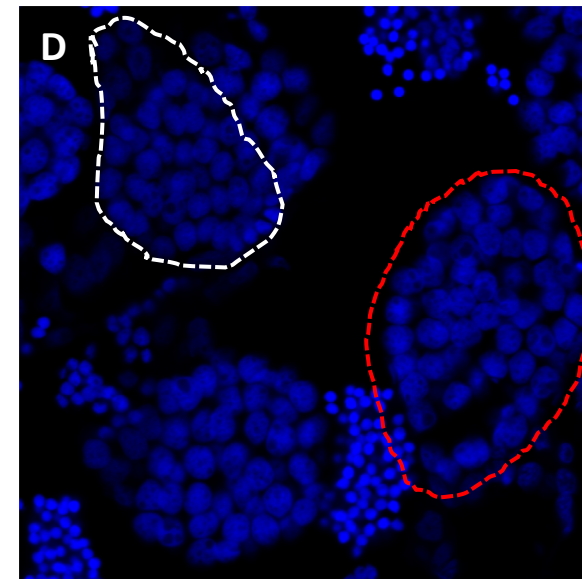

*smc1b*<sup>-/-</sup>

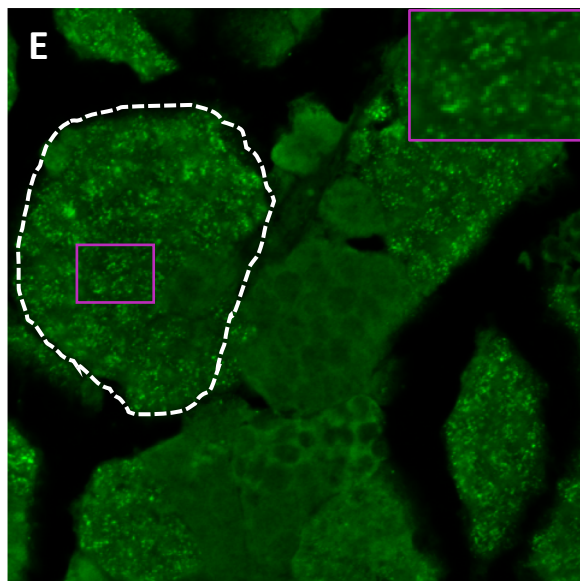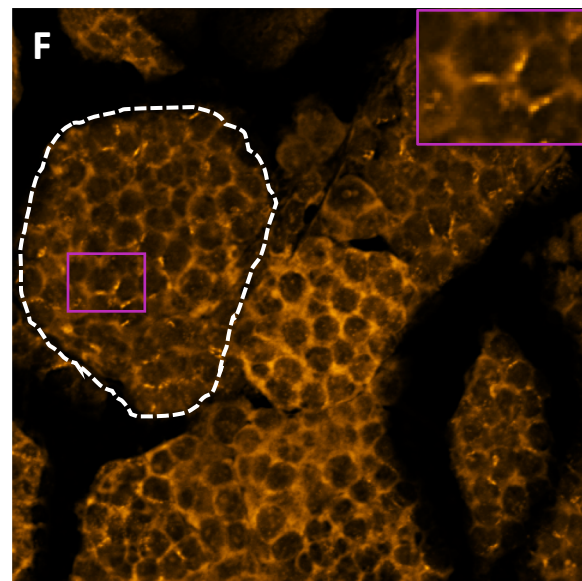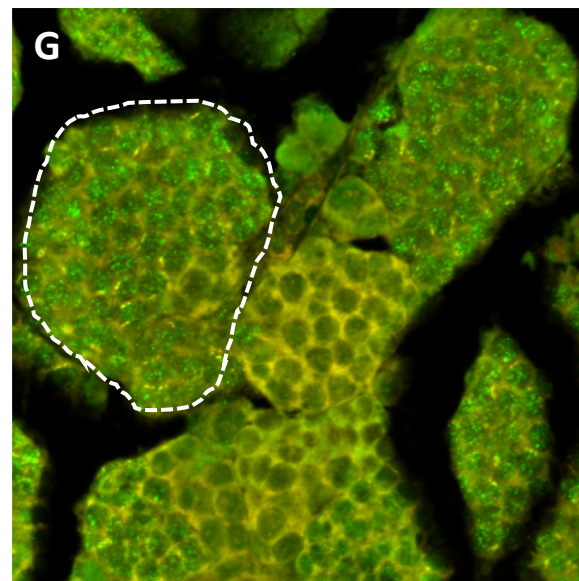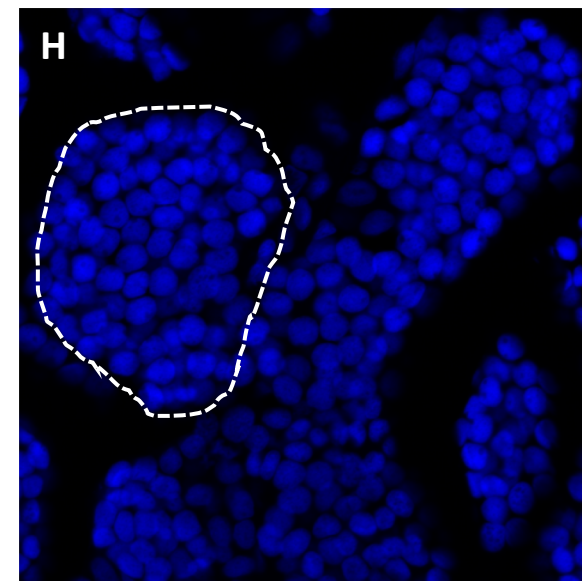

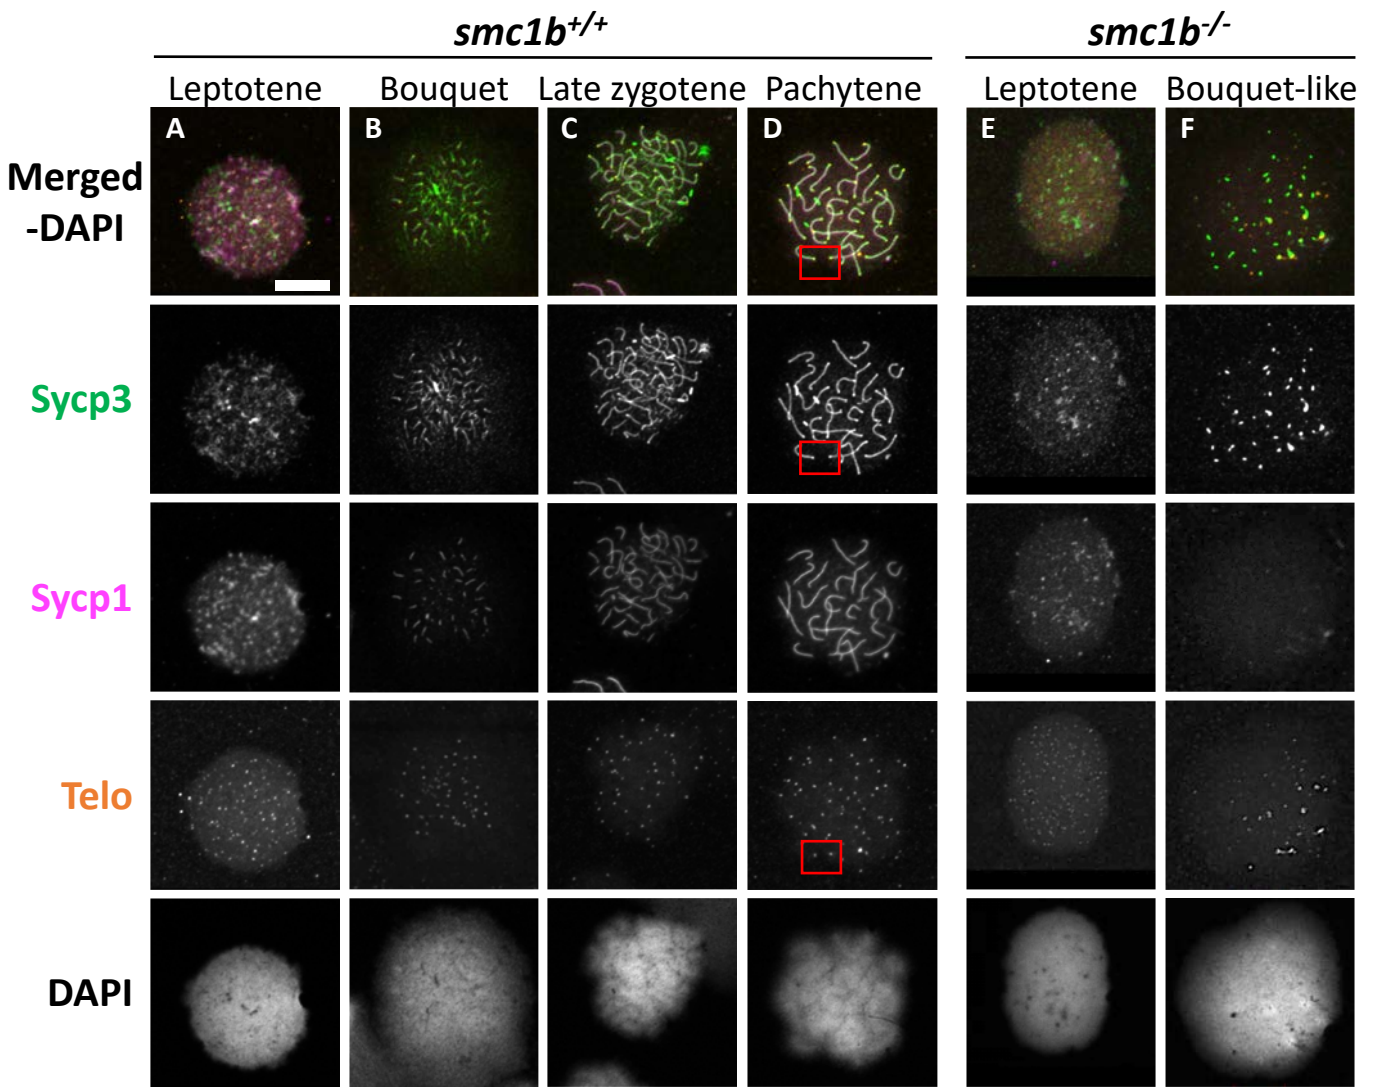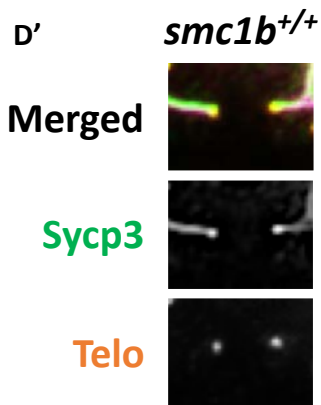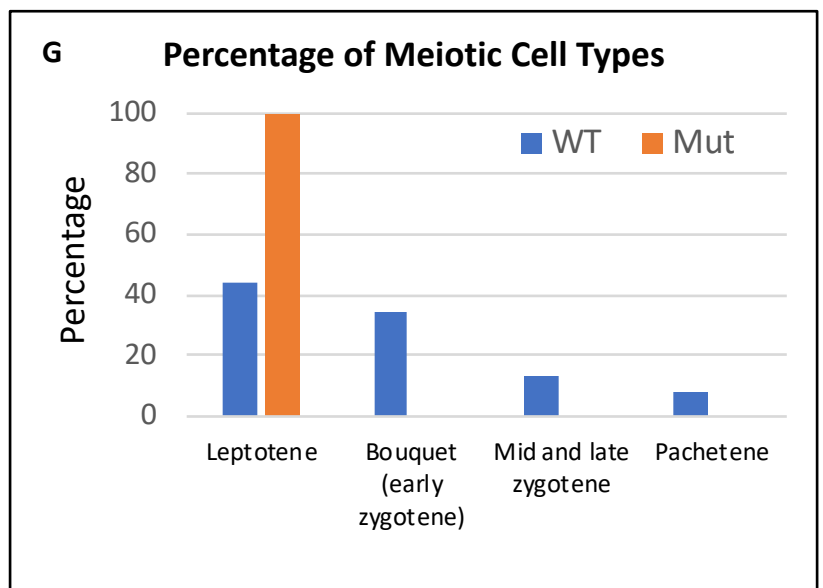



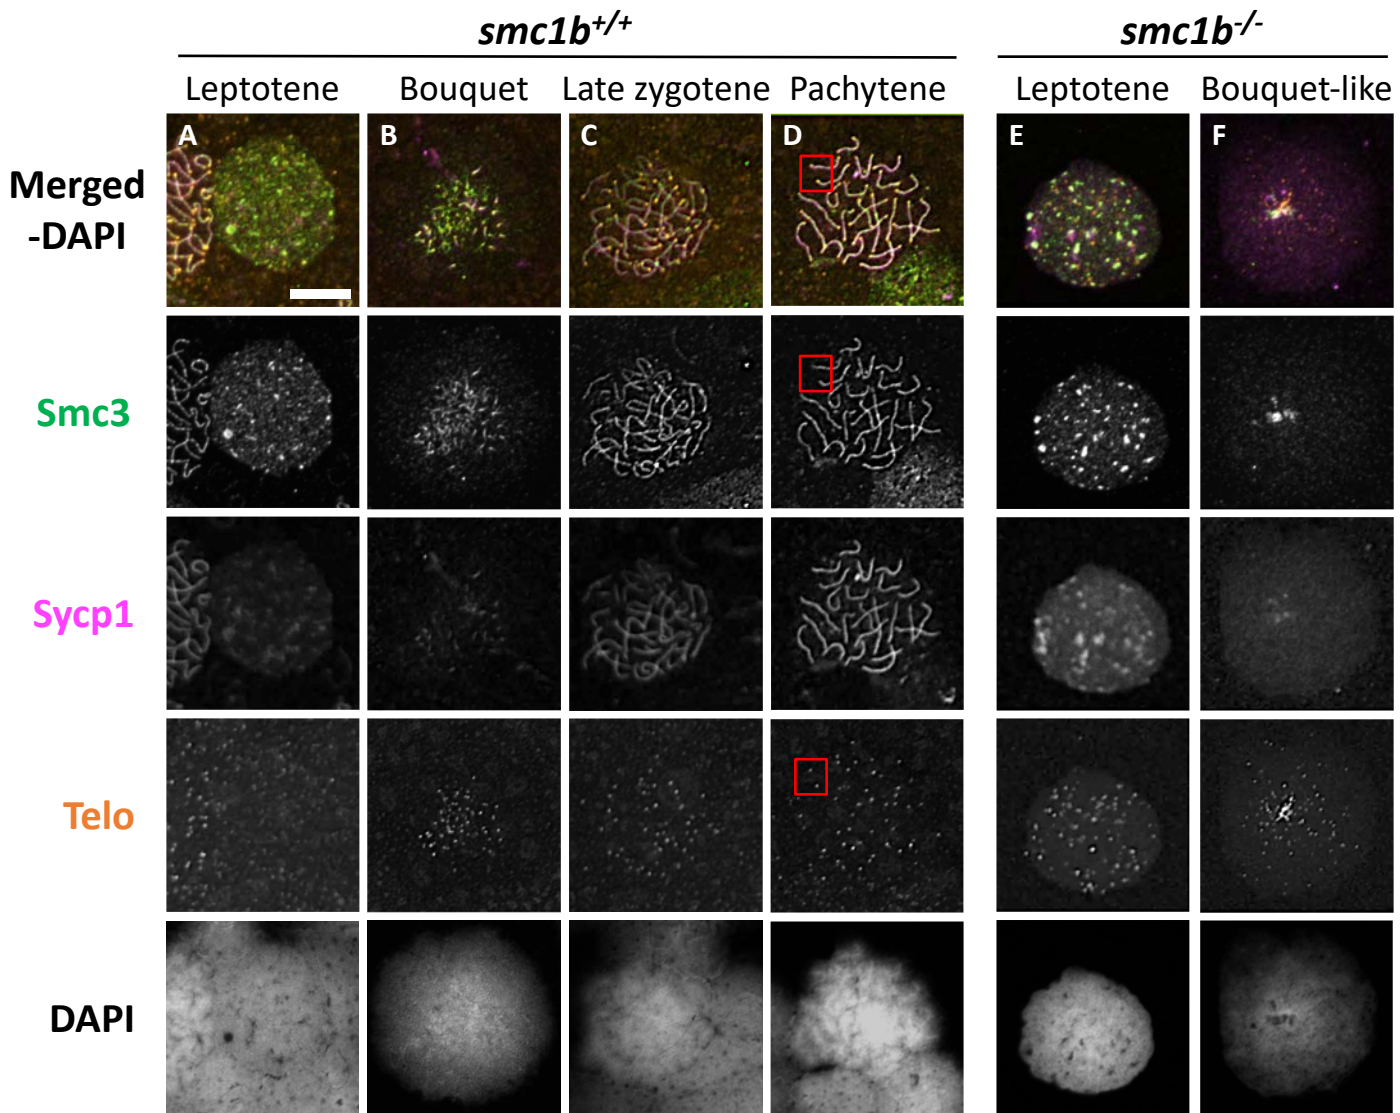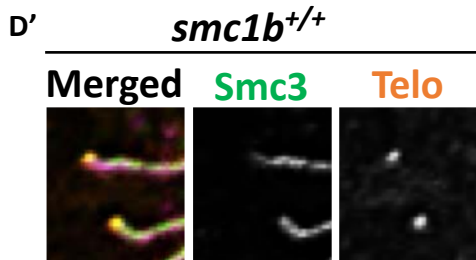

$\gamma$ -H2Ax

Telomere

DAPI

Merged

*smc1b*<sup>+/+</sup>

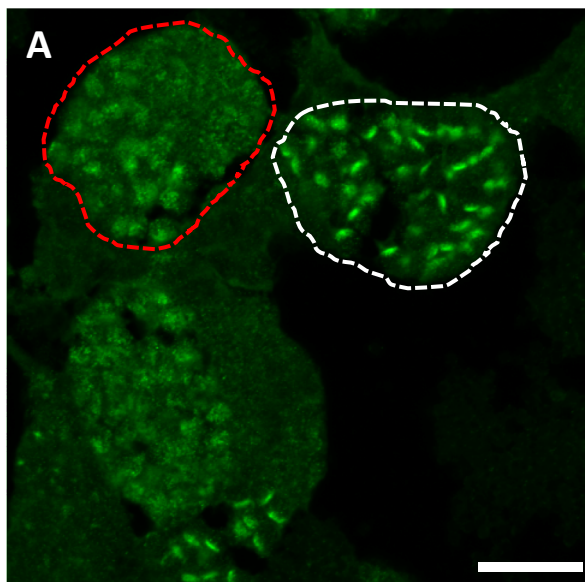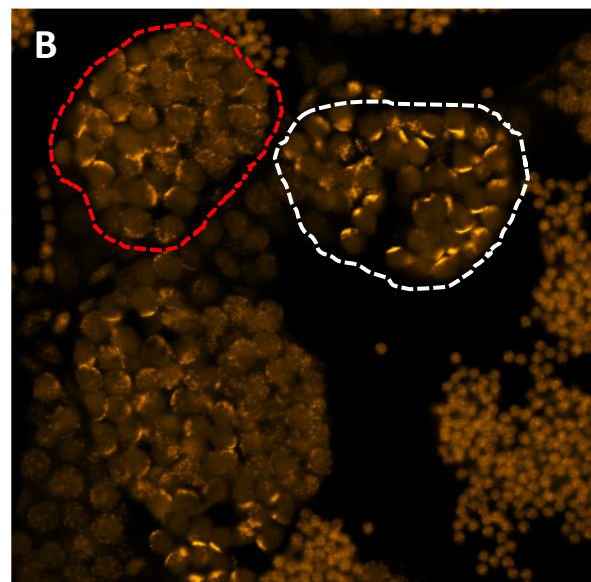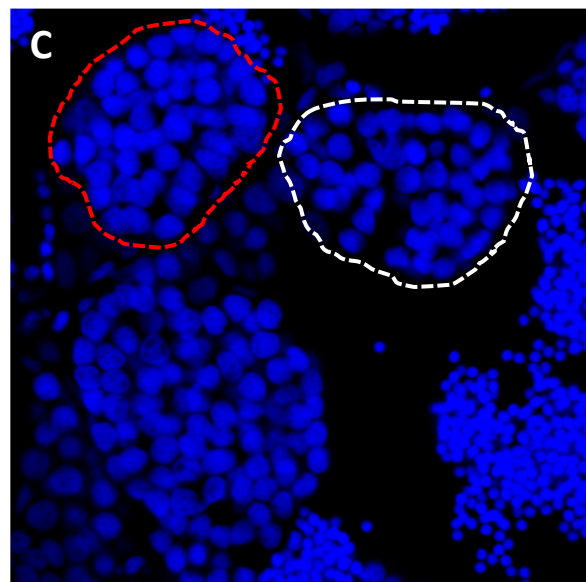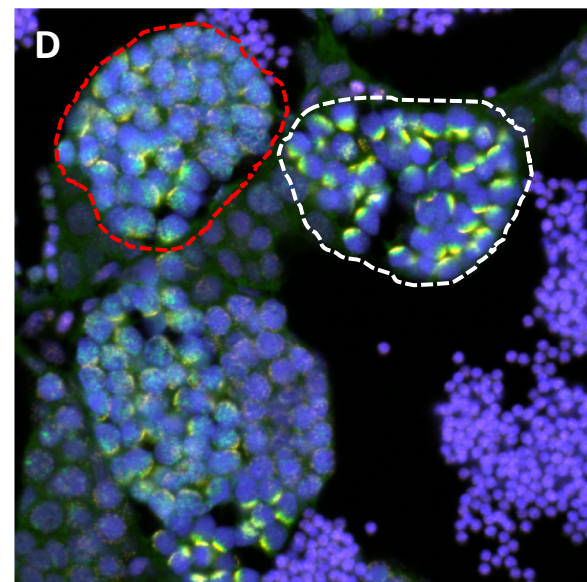

*smc1b*<sup>-/-</sup>

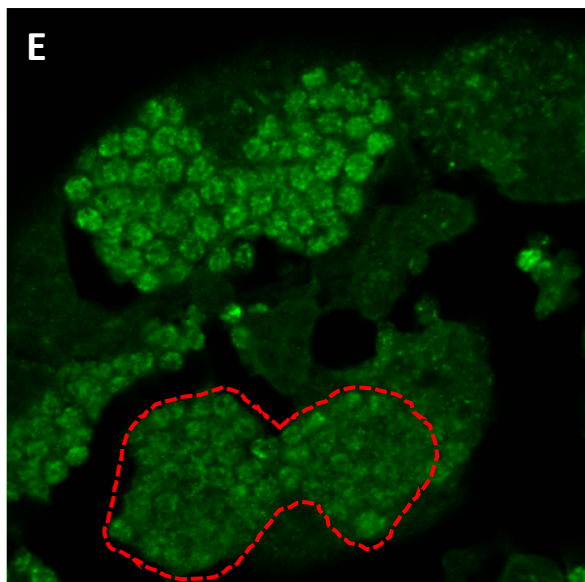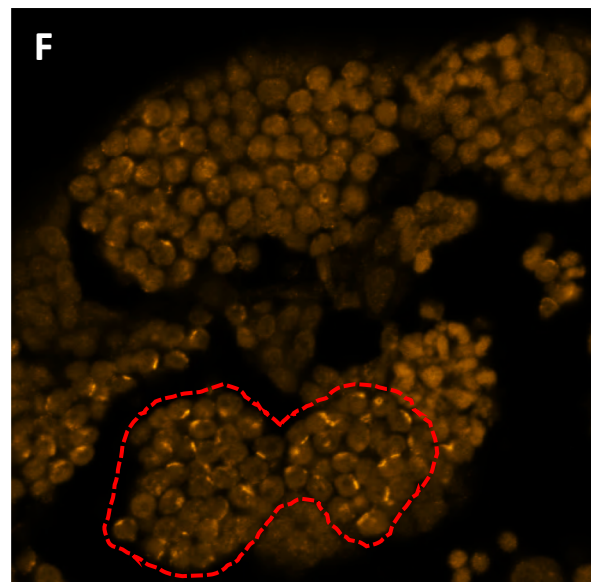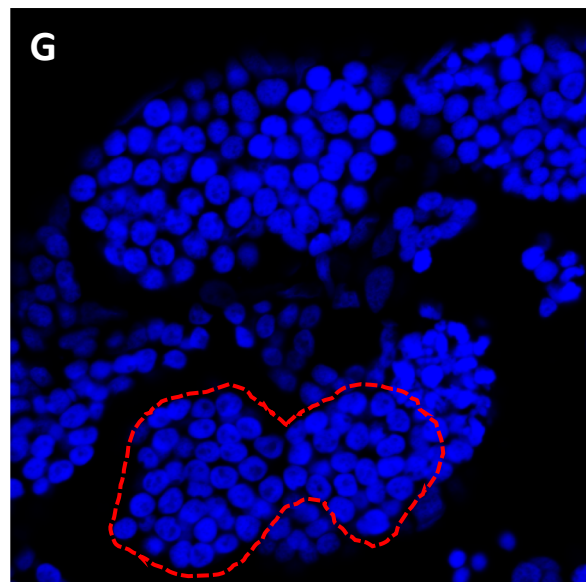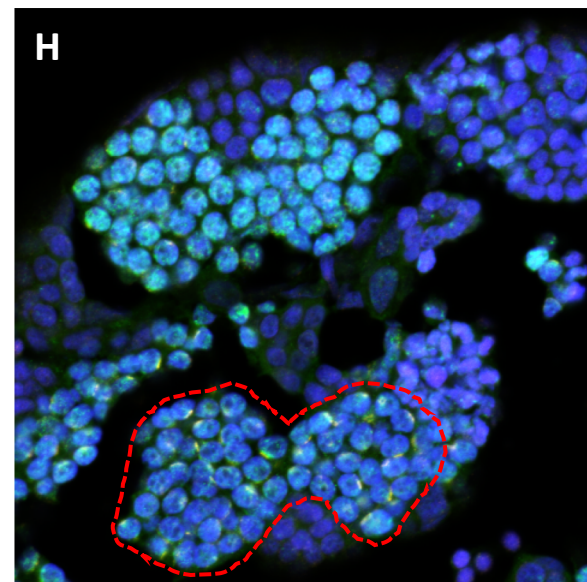



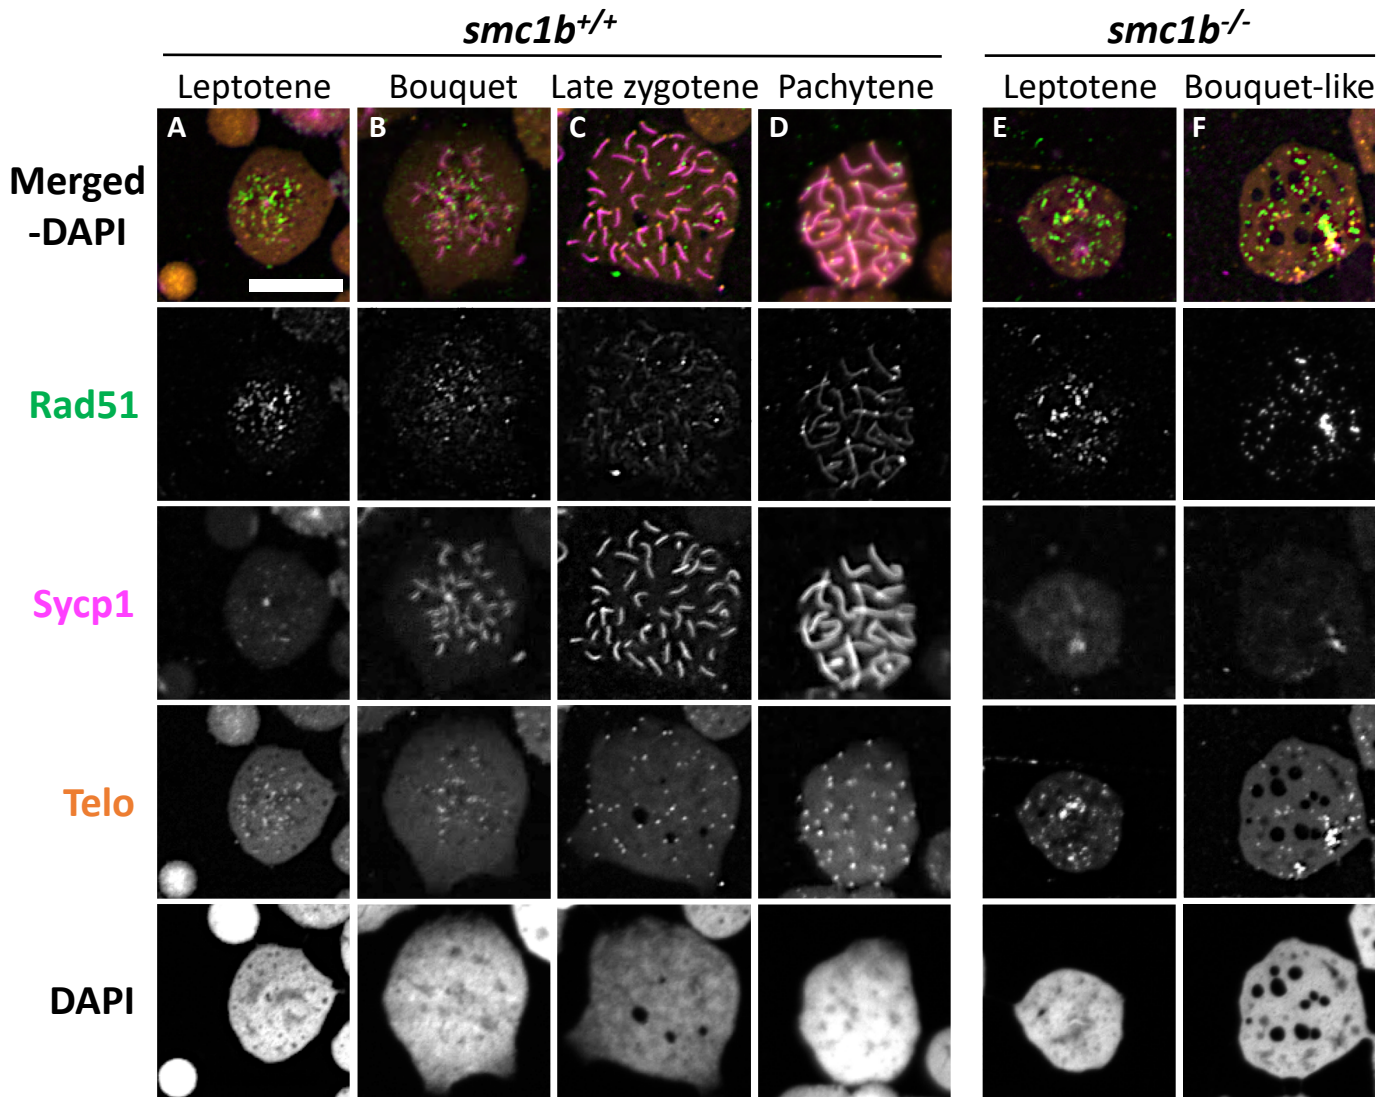

Source: https://www.biorxiv.org/content/10.1101/2021.05.25.445674v1.full.pdf
