# Supplementary material for: The zebrafish meiotic cohesion complex protein Smc1b is required for key events in meiotic prophase I
Source: bioRxiv or medRxiv preprint supplement (doi:10.1101/2021.05.25.445674), 2021-05-25
Supplement: Supplementary file [file media-1.pdf]

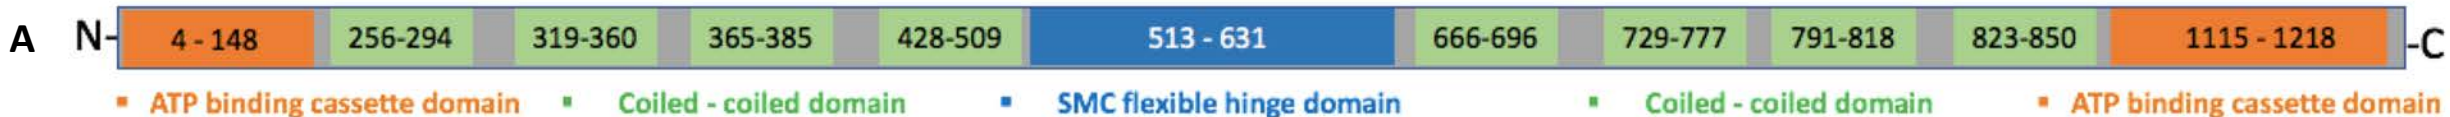

**C** N-terminal ABC domain

|        | Walker A                                                              | Amino acid # |
|--------|-----------------------------------------------------------------------|--------------|
| zSmc1b | MGFLKQLDVENFKSWRGKQTIGPFKRFNCII <b>GTNNGSGKSNVMDALGFVMGERAANLRVKH</b> | 60           |
| mSmc1b | MGHLELLLVENFKSWRGRQVIGPFKRFTCIIG <b>PNNGSGKSNVMDALSFVMGEKTTNLRVKH</b> | 60           |
| hSMC1B | MAHLELLLVENFKSWRGRQVIGPFRRFTCIIG <b>PNNGSGKSNVMDALSFVMGEKIANLRVKH</b> | 60           |
|        | *.:*: * *****:*.****:*.**** *****.*****: :*****:                      |              |
| zSmc1b | <b>TRDLIHGAHIGNPVSTFASVTMIYCGDNDEEMTF</b> SRRISGESSEYLVNGKHVTLAKYTGE  | 120          |
| mSmc1b | <b>IQELIHGAHTGKPVSSASVTIYIEDSGEEKTFTRI</b> IRGGCSEYHFGDKPVSRSVYVAQ    | 120          |
| hSMC1B | <b>IQELIHGAHIGKPISSASVKIYVEESGEEKTFARI</b> IRGGCSEFRFNDNLVRSVYIAE     | 120          |
|        | ::***** *:*:*: **.:** :..** **:* * * .*: :..: *: : * .:               |              |
| zSmc1b | <b>LQKIGIVVKAKNCLVYQGAVESIAMNAKERTKMF</b> ERISGSGDLNIEYFTKLAVLQKAKE   | 180          |
| mSmc1b | <b>LENIGIIVKAQNCLVFQGTVESISMKKPKERTQ</b> FFEEIISTSGEFIGEYBAKKKLQKAAE  | 180          |
| hSMC1B | <b>LEKIGIIVKAQNCLVFQGTVESISVKKPKERTQ</b> FFEEIISTSGELIGEYEEKRKLQKAAE  | 180          |
|        | *.:****:****:****:*.****: : *****:****.*** *: : * * *****:*           |              |

**D** Flexible hinge domain

|        |                                                                         | Amino acid # |
|--------|-------------------------------------------------------------------------|--------------|
| zSmc1b | LTKLQNARLDSQENRRQQRDEVLESRLRLYP <b>DTVYGR</b> LVELCQPIHKKYQLAVTKVFGK    | 540          |
| mSmc1b | RNELQNAGIDNHEGKRQQRKRAEVLEHLKRLYP <b>DSVFG</b> RLLDLCHPIHKKYQLAVTKLFGK  | 540          |
| hSMC1B | RSELQNAGIDTHEGKRQQRKRAEVLEHLKRLYP <b>DSVFG</b> RLLFDLCHPIHKKYQLAVTKVFGK | 540          |
|        | .:**** :*.:*.:***** **** *:*****:*.****.:**.:*****:*****:*.**:          |              |
| zSmc1b | <b>NMNAIVVTSAYVAHDCIRYLKEERAEPETFLPIDY</b> IDVPILNERLREVQAKMVDVVQC      | 600          |
| mSmc1b | <b>YMVAIVVASEKIAKDCIRFLKAERAEPETFLALD</b> YLDIKPINERLREIKGCKMMIDVIKT    | 600          |
| hSMC1B | <b>FITAIVVASEKVAKDCIRFLKEERAEPETFLALD</b> YLDIKPINERLRELKGCCKMVIDVIKT   | 600          |
|        | : *****: * :*.****:*** ***** :***: : *****:*.****:***:*                 |              |
| zSmc1b | <b>SQNPQLKRVIQYVCGNSLVCETLKDARRIA</b> FDGPERLQTVLDGTLFPRKSGVISGGSSD     | 660          |
| mSmc1b | -- <b>QFPQLK</b> KVQFVCGNGLVCETVEEARHIAFGGPERRKAVALDGTFLPKSGVISGGSSD    | 658          |
| hSMC1B | -- <b>QFPQLK</b> KVQFVCGNGLVCETMEEARHIALSGPERQKTVALDGTFLPKSGVISGGSSD    | 658          |
|        | : ****:***:****.*****:*.****.:**.:***** *****                           |              |

**E** C-terminal ABC domain

|        | Signature motif                                                                       | Amino acid # |
|--------|---------------------------------------------------------------------------------------|--------------|
| zSmc1b | QIYKKLCRNASQAAILSANPNPEYLDGINYNCV <b>APGKR</b> F <b>MAMDNLSGGEK</b> AI <b>AALALVF</b> | 1140         |
| mSmc1b | QIYKKLCRNNSAQAFSLPENPEEPYLDGISYNCV <b>APGKR</b> F <b>MPMDNLSGGEK</b> CVAALALLF        | 1137         |
| hSMC1B | QIYKKLCRNNSAQAFSLPENPEEPYLEGISYNCV <b>APGKR</b> F <b>MPMDNLSGGEK</b> CVAALALLF        | 1138         |
|        | ***** ***:** ***:****:*.***** *****.*****: :*****:*                                   |              |
|        | Walker B D Loop                                                                       |              |
| zSmc1b | <b>AIHSFRPAPFFVLDE</b> VDAALDNTNIGKVTGFFRMSRESCQIIVISLKEEFYSRADALLG                   | 1200         |
| mSmc1b | <b>AVHSFRPAPFFVLDE</b> VDAALDNTNIGKVSSYIKEQSQEQFQMIISLKEEFYSKADALIG                   | 1197         |
| hSMC1B | <b>AVHSFRPAPFFVLDE</b> VDAALDNTNIGKVSSYIKEQTQDQFQMIIVISLKEEFYSRADALIG                 | 1198         |
|        | *.:*****:*****:*****:..: :..: *.:*****:*****:*                                        |              |
| zSmc1b | <b>VYSMFDECMFSRLLTLDL</b> TPYPLKDENATDREKDK-----                                      | 1235         |
| mSmc1b | <b>VYPEHNECMF</b> SHVLTLDLSKYPDTEDEGSRSHRKPVRVPRVSMSPKSPQSR                           | 1248         |
| hSMC1B | <b>IYPEYDDCMF</b> SRVLTLDLSQYPDETEGQESSKRHGSR-----                                    | 1235         |
|        | :* .:****:*****: ** .: : .: : :                                                       |              |
