# Supplementary material for: The zebrafish meiotic cohesion complex protein Smc1b is required for key events in meiotic prophase I
Source: bioRxiv or medRxiv preprint supplement (doi:10.1101/2021.05.25.445674), 2021-05-25

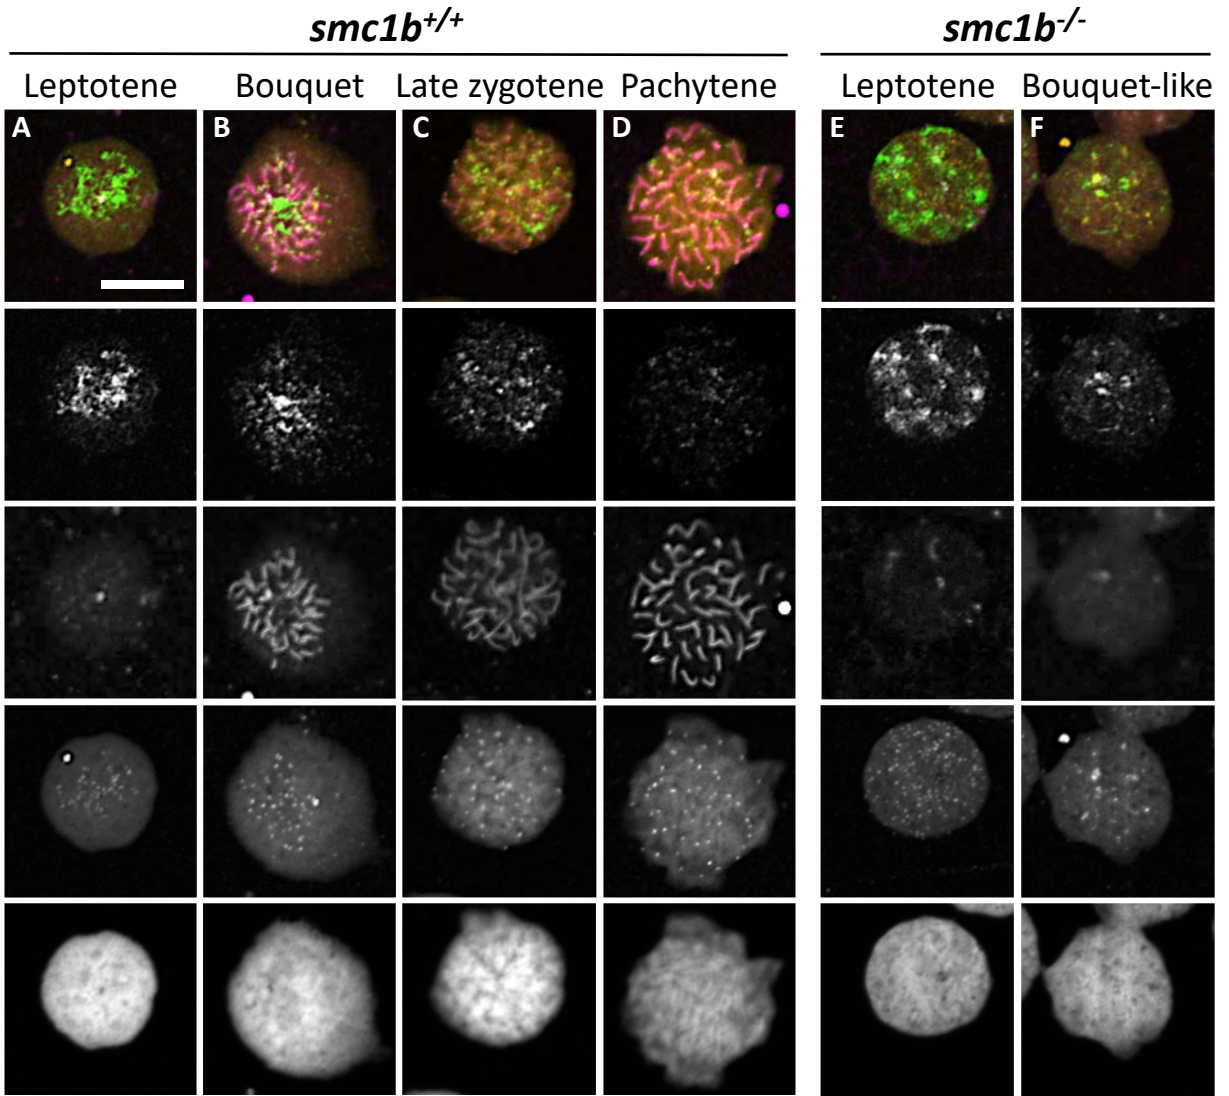

Supplement: Supplementary file [file media-2.pdf]
